# Supplementary material
Source: publisher site journal article supplement (https://www.dovepress.com/article/99671)
Supplement: Supplementary file 1 [file get_supplementary_file.php]

## Supporting information

### Lead Identification for the K-Ras Protein: Virtual screening and combinatorial fragment-based approaches

Akbar Ali khan Pathan<sup>1,2\*</sup>, Bhavana Panthi<sup>3\*</sup>, Zahid Khan<sup>1</sup>, Purushotham Reddy Koppula<sup>4,6</sup>, Mohammed Saud Alanazi<sup>1</sup>, Sachchidanand<sup>3</sup>, Narasimha Reddy Parine<sup>1</sup>, Mukesh Chourasia<sup>3\*</sup>

#### Figures and Tables

**Figure S1:** Structure of top docking scored designed molecules for K-Ras protein

**Figure S2:** Ligands interactions with GDP bound conformation of K-Ras protein: **a).** interactions with GDP; **b).** interactions with M1; **c).** interactions with M2; **d).** interactions with M3; **e).** interactions with M4; **f).** interactions with M5; **g).** interactions with M6; **h).** interactions with M7; **i).** interactions with M8; **j).** interactions with M9; **k).** interactions with M10; **l).** interactions with M11; **m).** interactions with M12; **n).** interactions with M13. \* Colour code label: H-bonding residues in brown, pi-pi and pi-cation interacting residues in green, active site residues in black, hydrophobic residues in grey.

**Figure S3:** Ligands interactions with GTP bound conformation of K-Ras protein: **a).** interactions with GTP; **b).** interactions with M12; **c).** interactions with M13; **d).** interactions with M14; **e).** interactions with M15; **f).** interactions with M16; **g).** interactions with M17; **h).** interactions with M18; **i).** interactions with M19; **j).** interactions with M20; **k).** interactions with M5; **l).** interactions with M21; **m).** interactions with M22; **n).** interactions with M23; **o).** interactions with M24; **p).** interactions with M25; **q).** interactions with M26; **r).** interactions with M27; **s).** interactions with M28. \* Colour code label: H-bonding residues in brown, pi-pi and pi-cation interacting residues in green, active site residues in black, hydrophobic residues in grey.

**Figure S4:** Contribution of H-Bond interaction of active site residues of the top 13 designed molecules for GDP bound conformation of K-Ras protein on glide docking

**Figure S5:** Contribution of Van der walls interaction of active site residues of the top 13 designed molecules for GDP bound conformation of K-Ras protein on glide docking

**Figure S6:** Contribution of Coulomb interaction of active site residues of the top 13 designed molecules for GDP bound conformation of K-Ras protein on glide docking

**Figure S7:** Contribution of H-Bond interaction of active site residues of the top 18 designed molecules for GTP bound conformation of K-Ras protein on glide docking

**Figure S8:** Contribution of Van der Waals interaction of active site residues of the top 18 designed molecules for GTP bound conformation of K-Ras protein on glide docking

**Figure S9:** Contribution of Coulomb interaction of active site residues of the top 18 designed molecules for GTP bound conformation of K-Ras protein on glide docking

**Figure S10:** Comparison of docking methods (rigid and flexible docking) a). Top 13 designed molecules for GDP bound conformation of K-Ras protein. b). Top 18 designed molecules for GTP bound conformation of K-Ras protein.

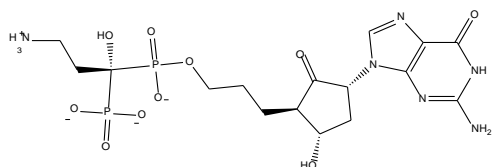

M1

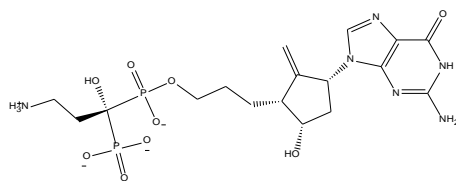

M2

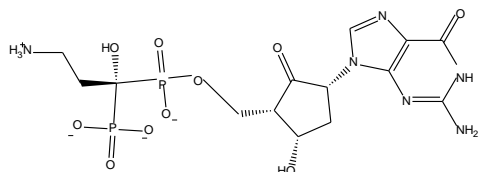

M3

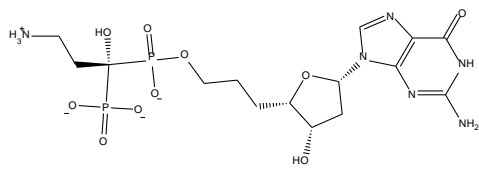

M4

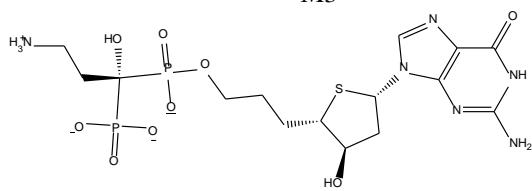

M5

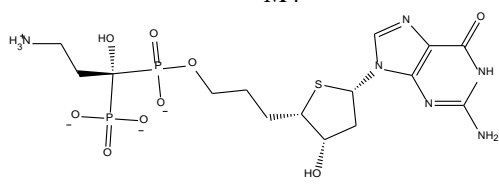

M6

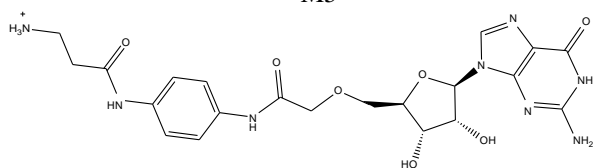

M7

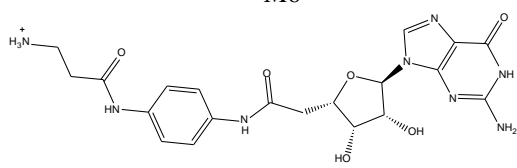

M8

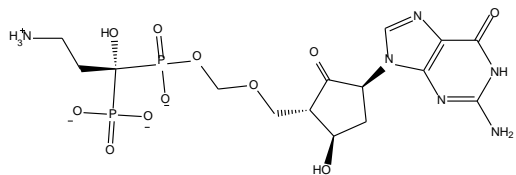

M9

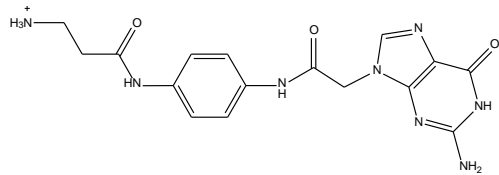

M10

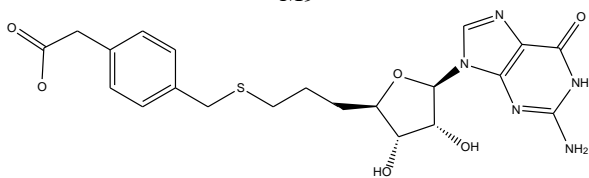

M11

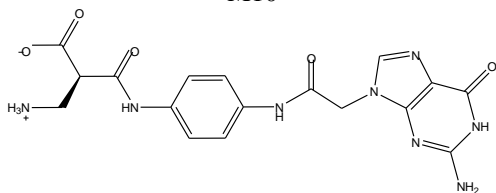

M12

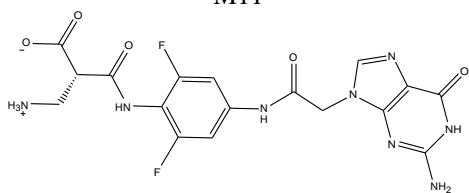

M13

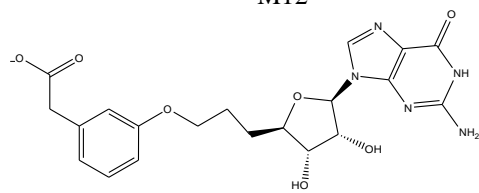

M14

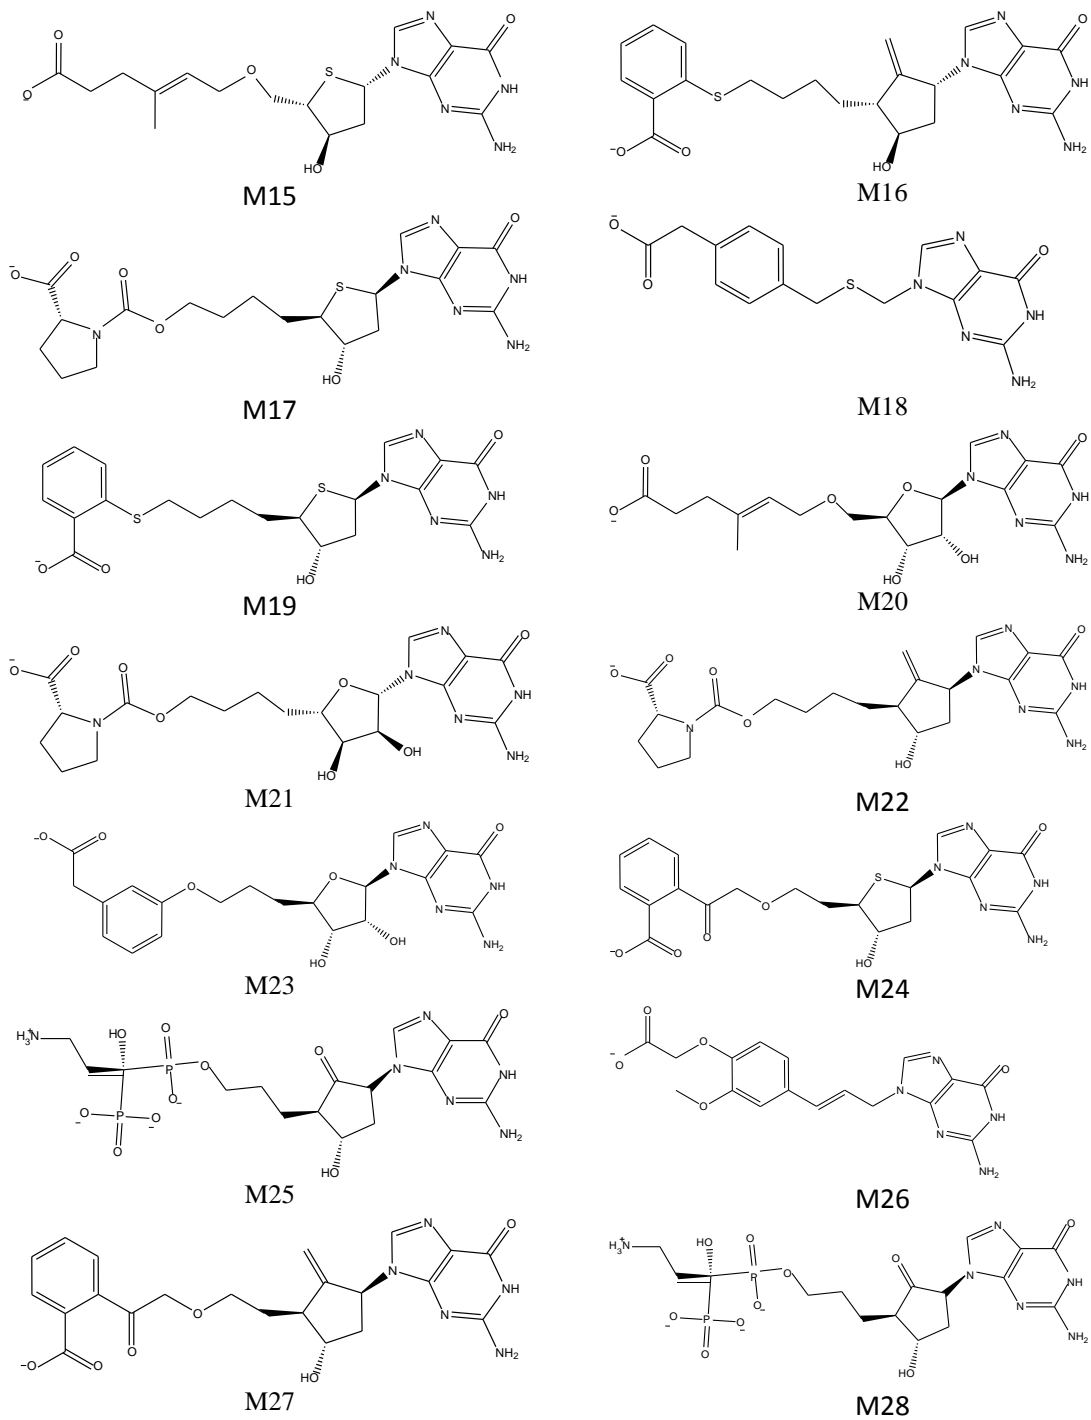

**Figure S1:** structure of top docking scored designed molecules for K-Ras protein

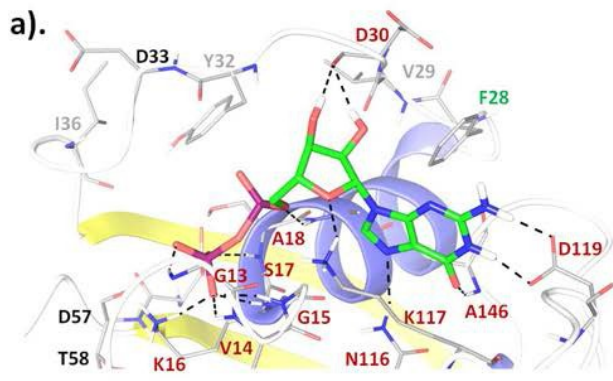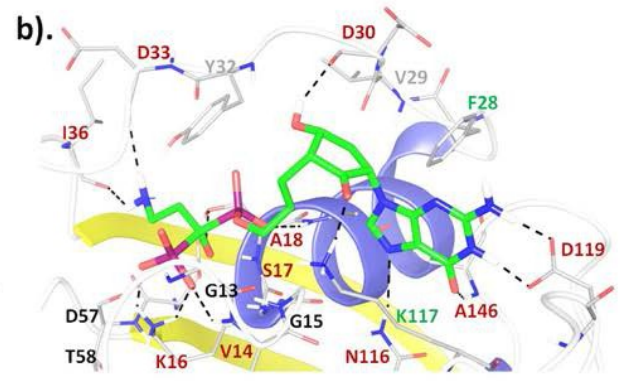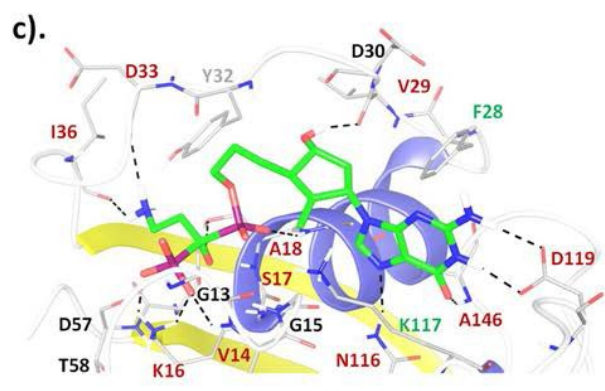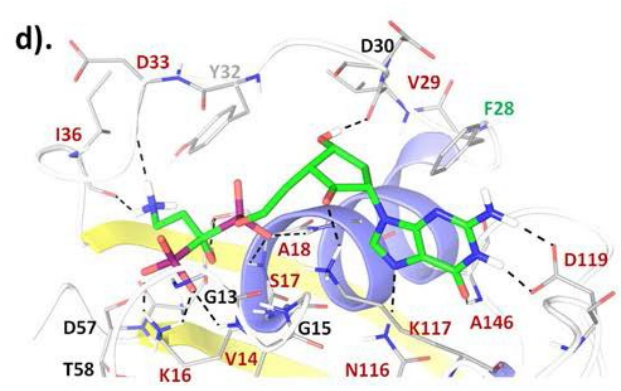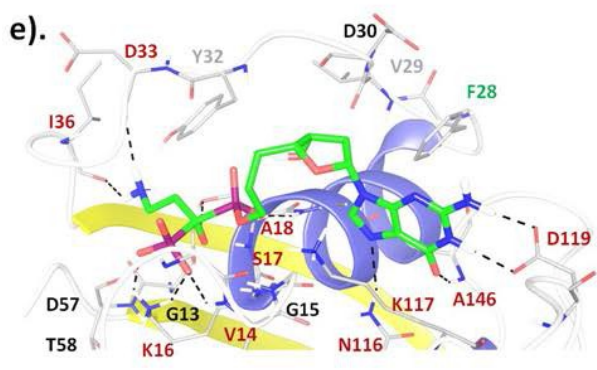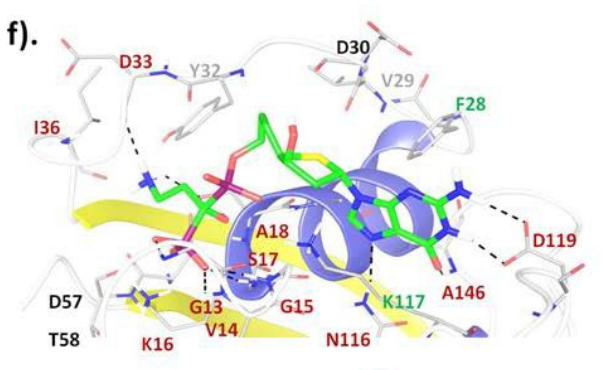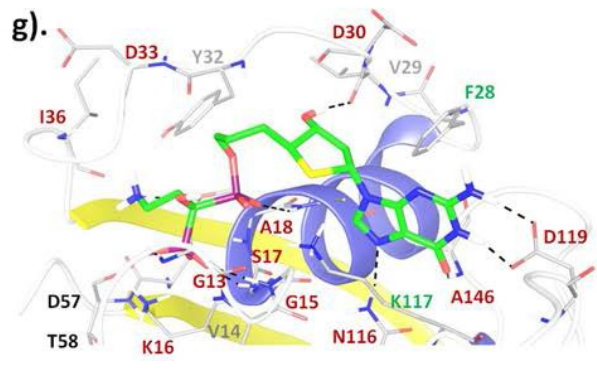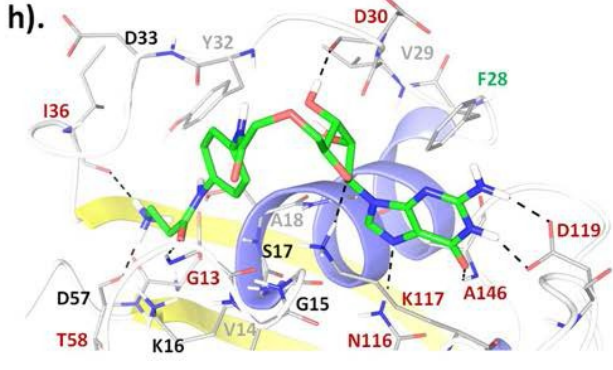

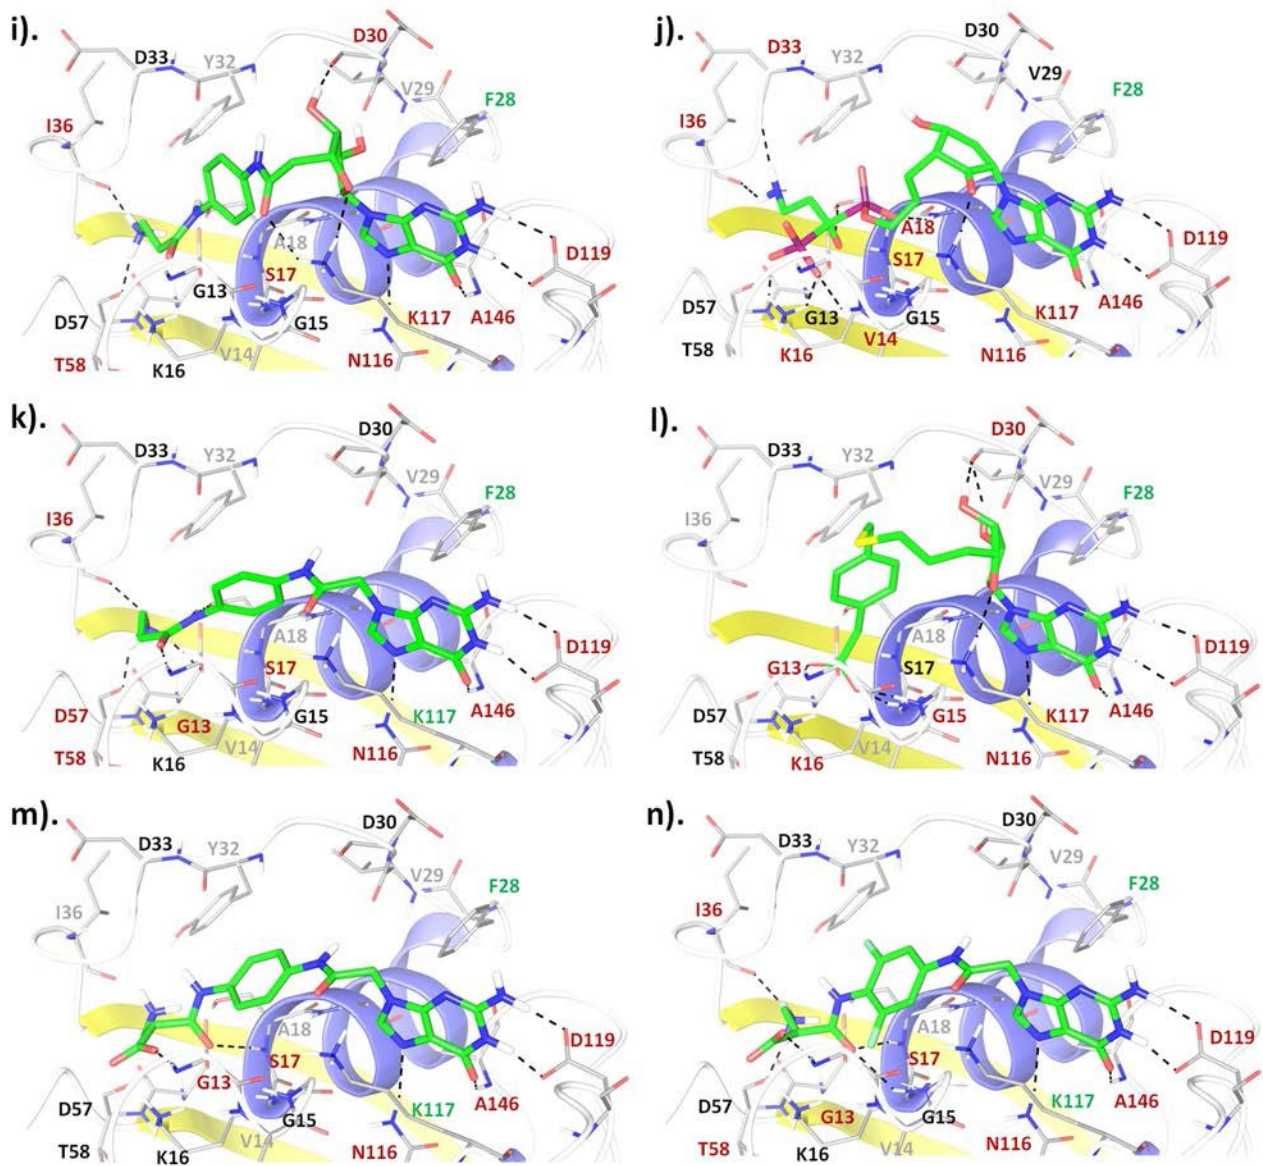

**Figure S2:** Ligands interactions with GDP bound conformation of K-Ras protein: **a).** interactions with GDP; **b).** interactions with M1; **c).** interactions with M2; **d).** interactions with M3; **e).** interactions with M4; **f).** interactions with M5; **g).** interactions with M6; **h).** interactions with M7; **i).** interactions with M8; **j).** interactions with M9; **k).** interactions with M10; **l).** interactions with M11; **m).** interactions with M12; **n).** interactions with M13. \* Colour code label: H-bonding residues in brown, pi-pi and pi-cation interacting residues in green, active site residues in black, hydrophobic residues in grey.

a).

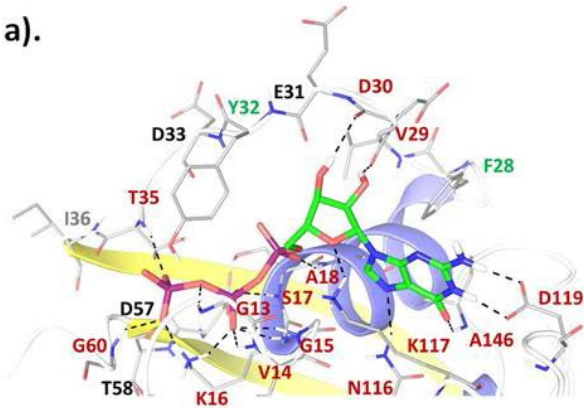

b).

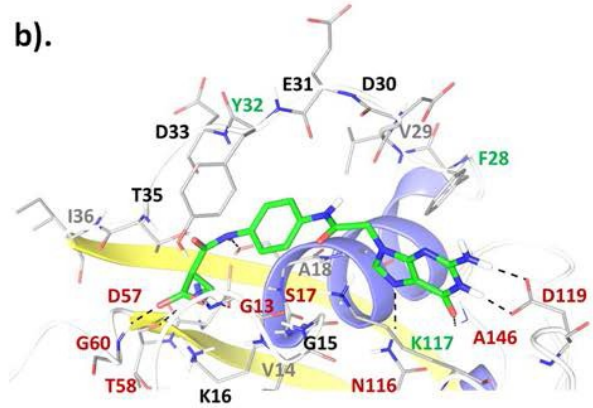

c).

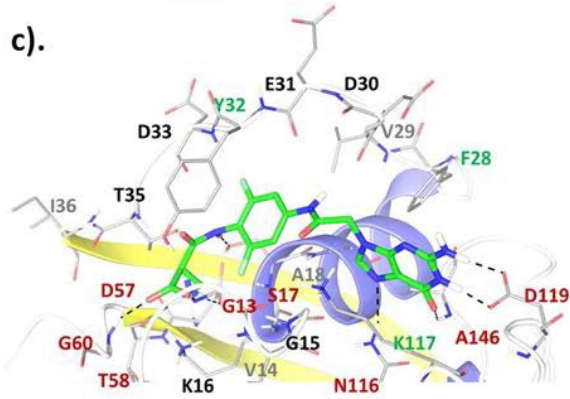

d).

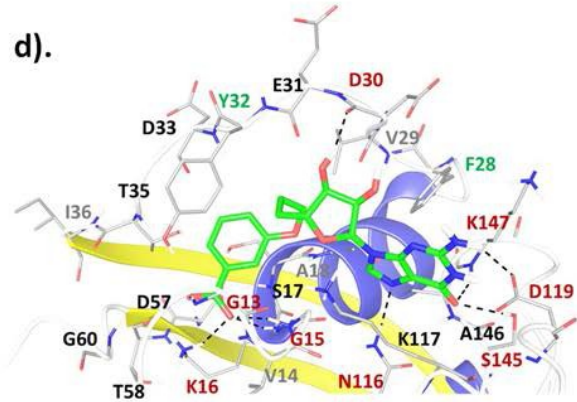

e).

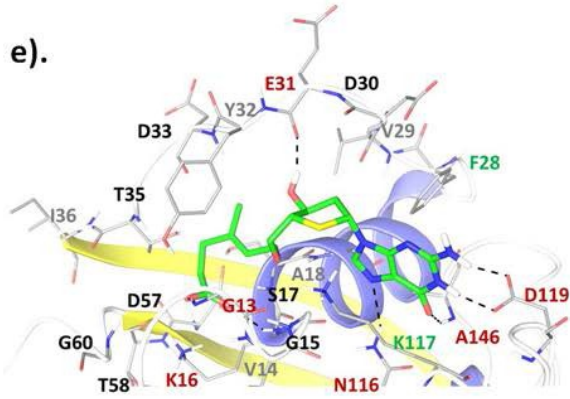

f).

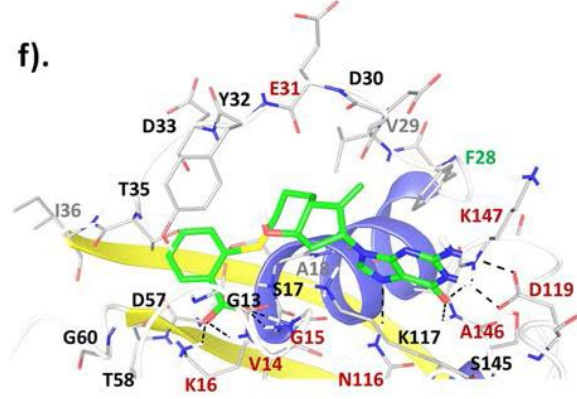

g).

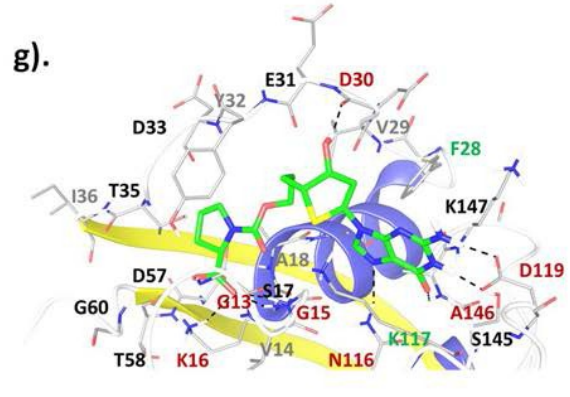

h).

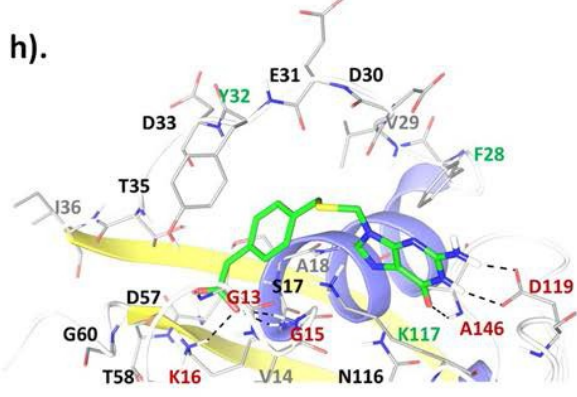

i).

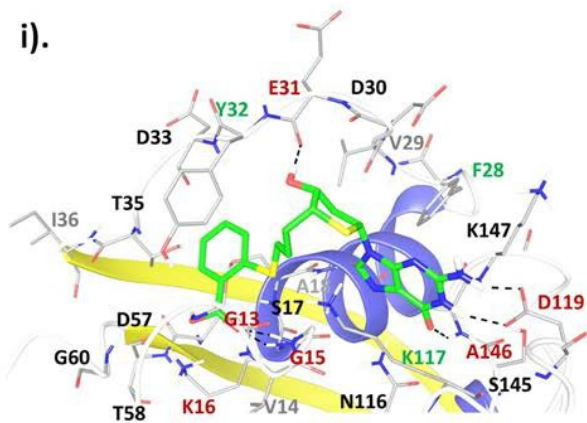

j).

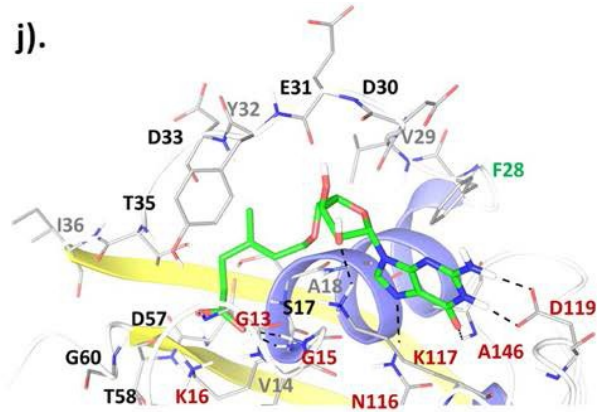

k).

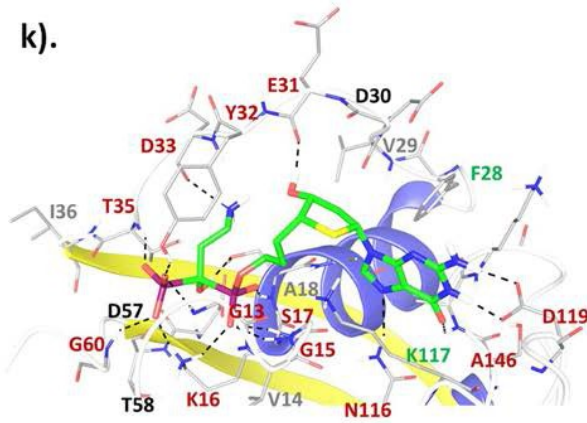

l).

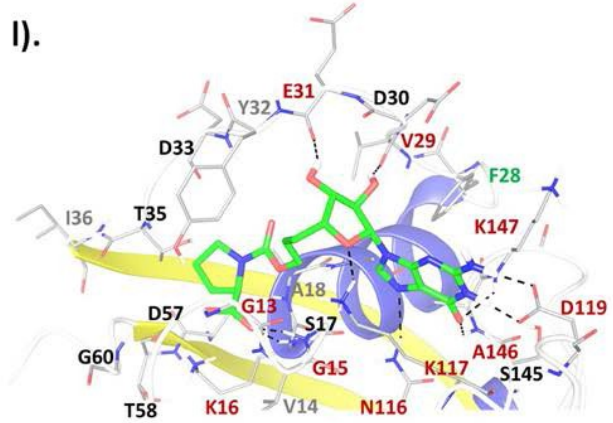

m).

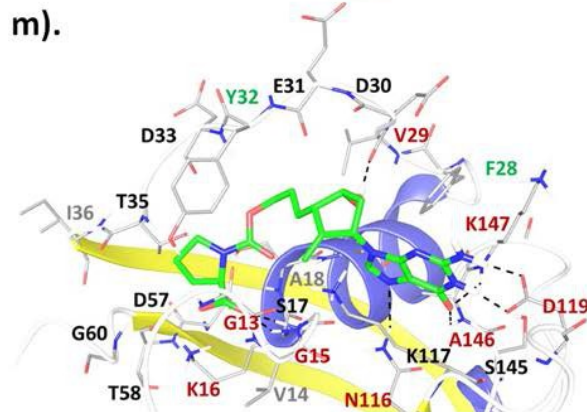

n).

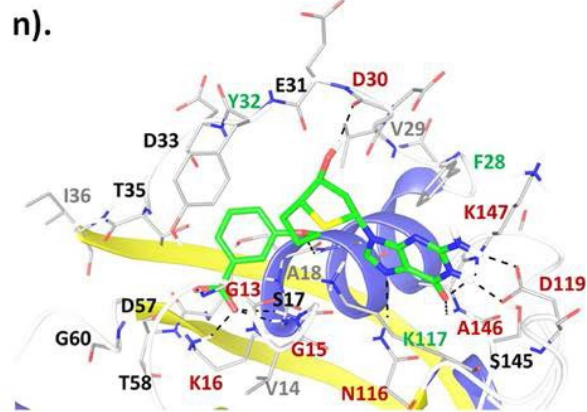

o).

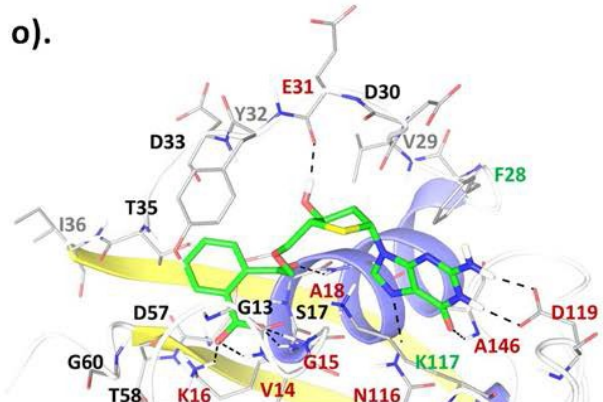

p).

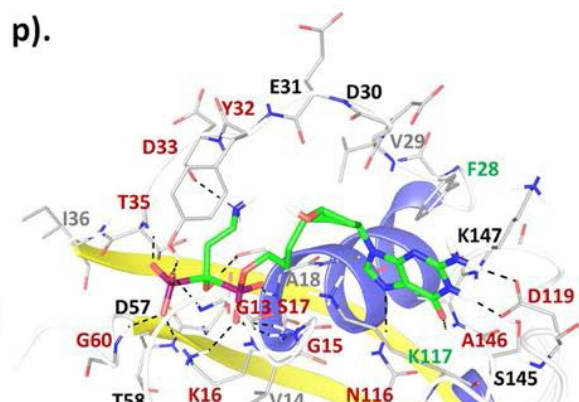



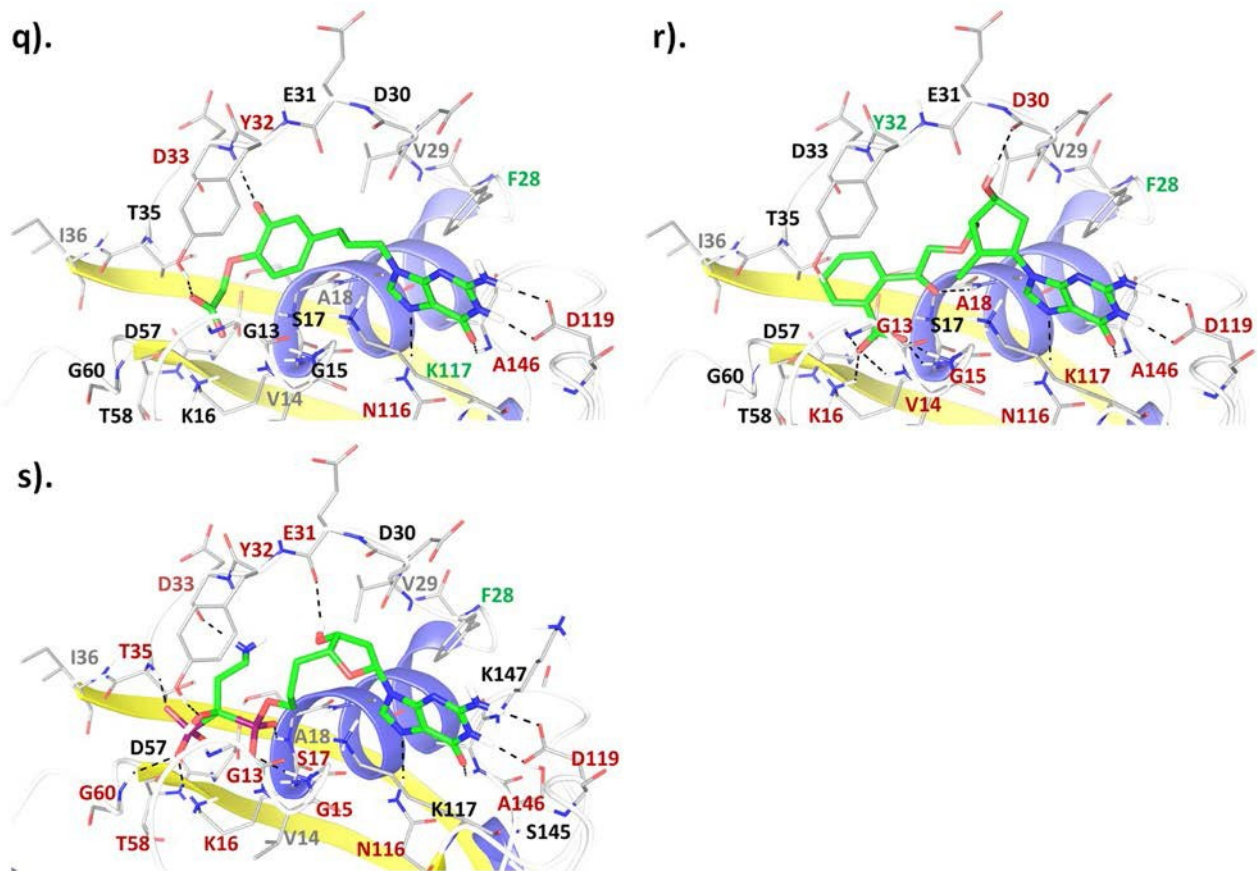

**Figure S3:** Ligands interactions with GTP bound conformation of K-Ras protein: **a).** interactions with GTP; **b).** interactions with M12; **c).** interactions with M13; **d).** interactions with M14; **e).** interactions with M15; **f).** interactions with M16; **g).** interactions with M17; **h).** interactions with M18; **i).** interactions with M19; **j).** interactions with M20; **k).** interactions with M5; **l).** interactions with M21; **m).** interactions with M22; **n).** interactions with M23; **o).** interactions with M24; **p).** interactions with M25; **q).** interactions with M26; **r).** interactions with M27; **s).** interactions with M28. \* Colour code label: H-bonding residues in brown, pi-pi and pi-cation interacting residues in green, active site residues in black, hydrophobic residues in grey.

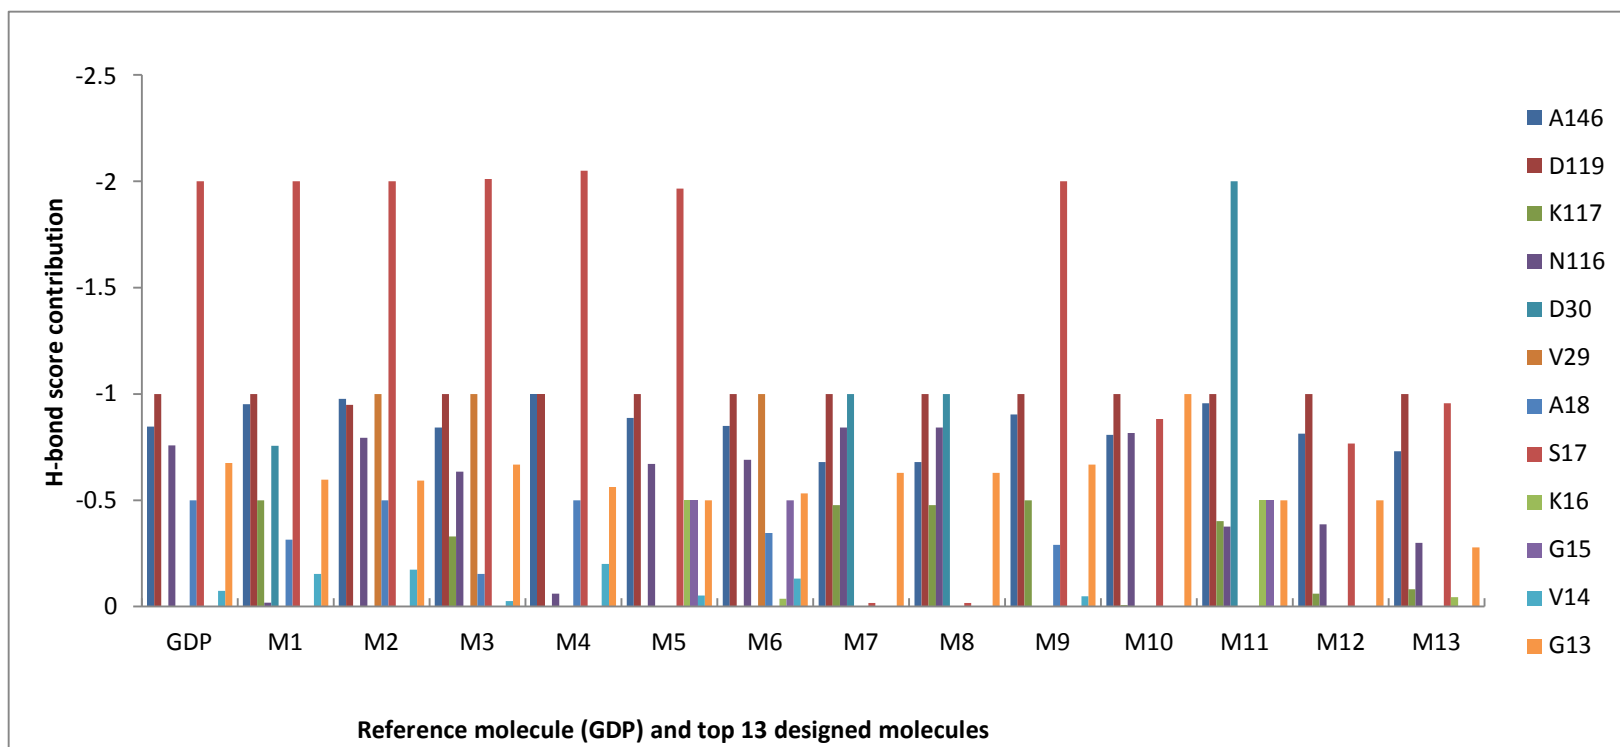

**Figure S4:** Contribution of H-Bond interaction of active site residues of the top 13 designed molecules for GDP bound conformation of K-Ras protein on glide docking

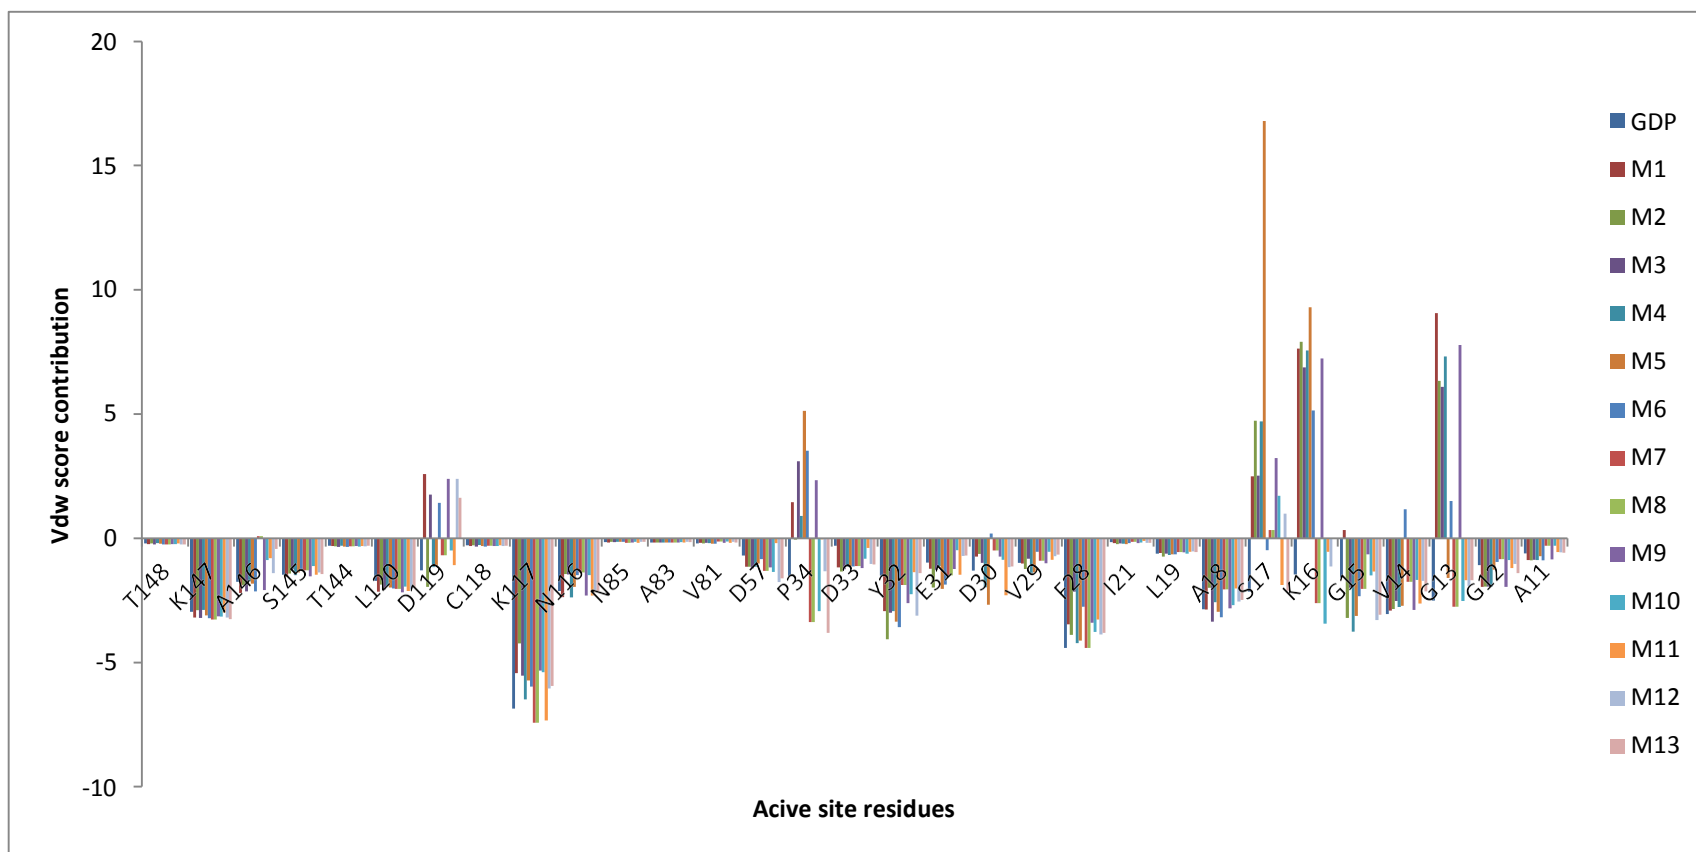

**Figure S5:** Contribution of Van der walls interaction of active site residues of the top 13 designed molecules for GDP bound conformation of K-Ras protein on glide docking.

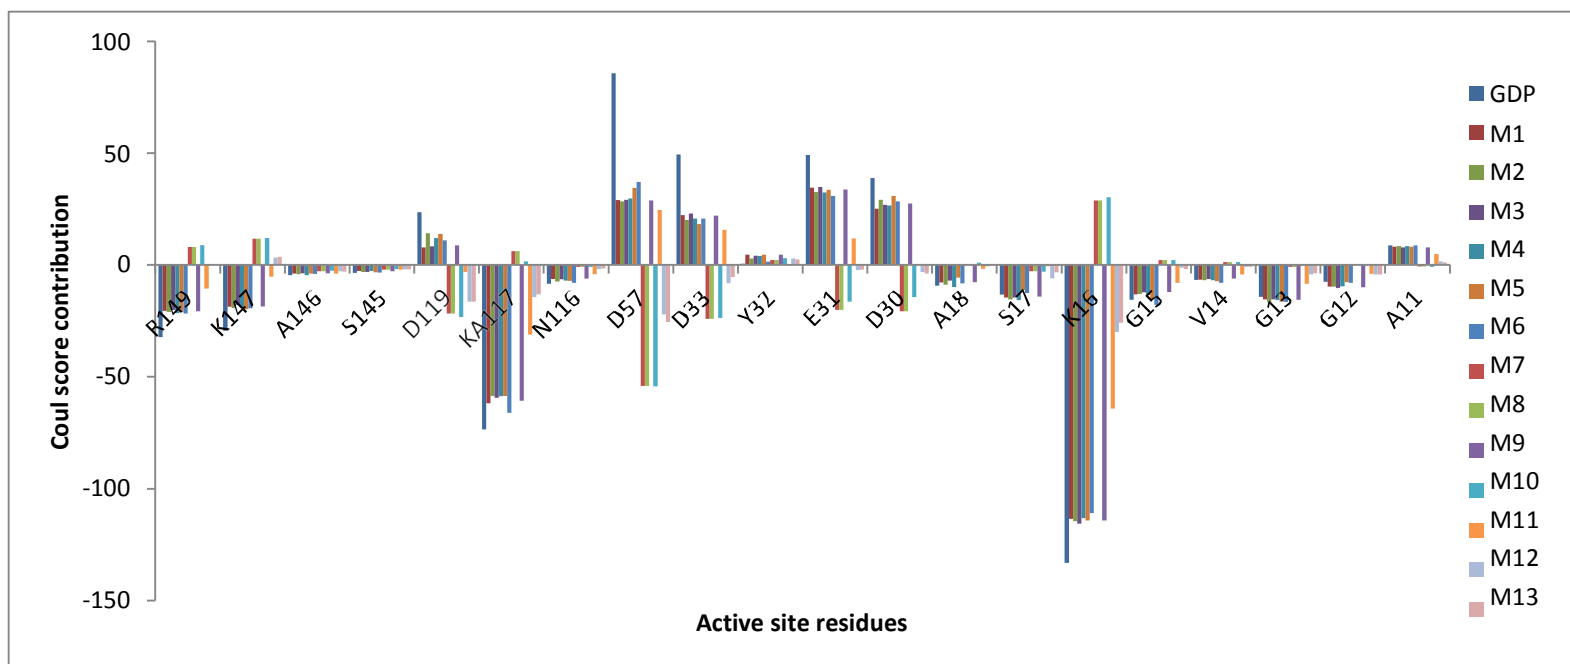

**Figure S6:** Contribution of Coulomb interaction of active site residues of the top 13 designed molecules for GDP bound conformation of K-Ras protein on glide docking.

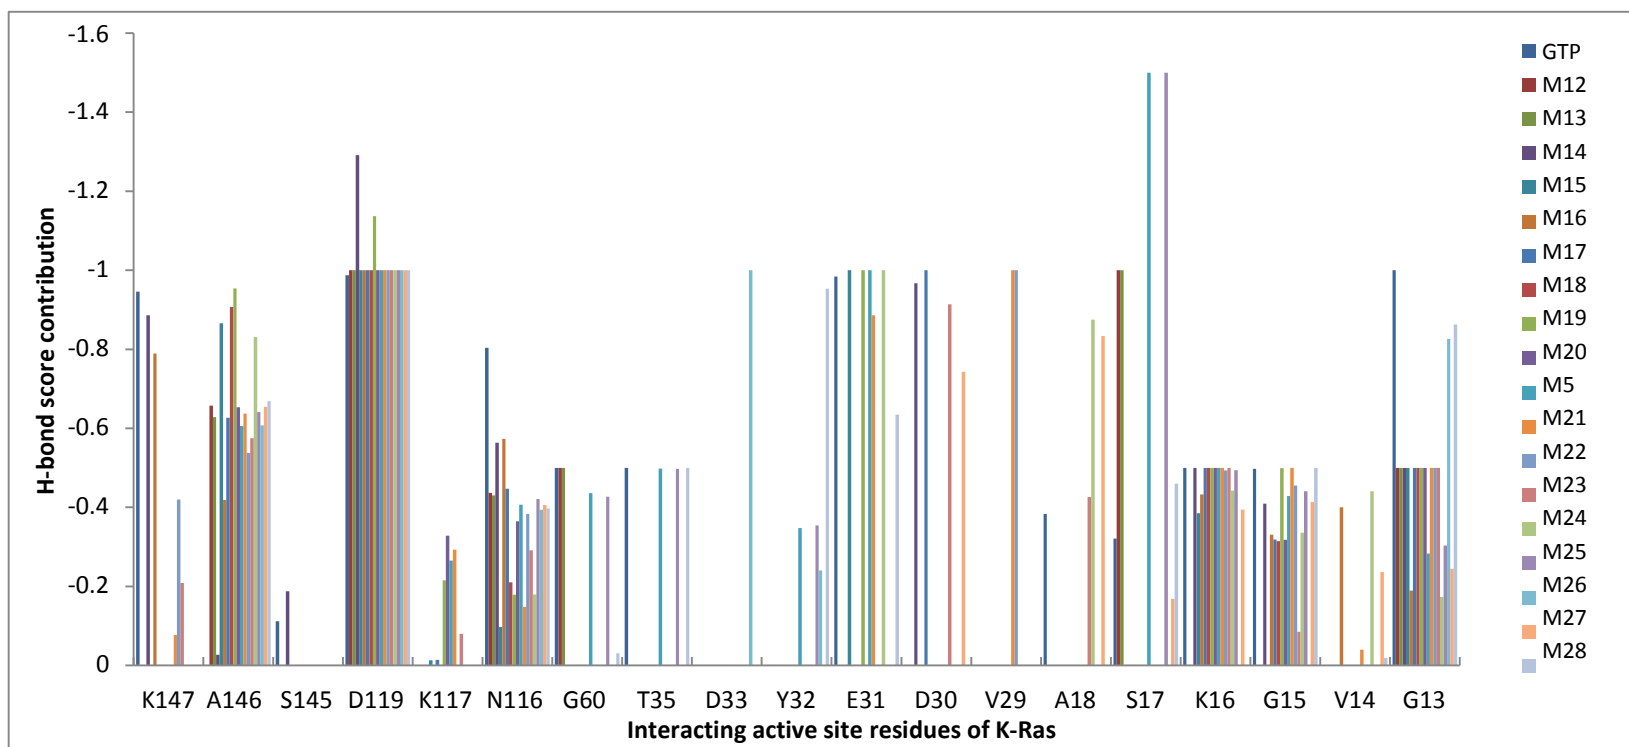

**Figure S7:** Contribution of H-Bond interaction of active site residues of the top 18 designed molecules for GTP bound conformation of K-Ras protein on glide docking.

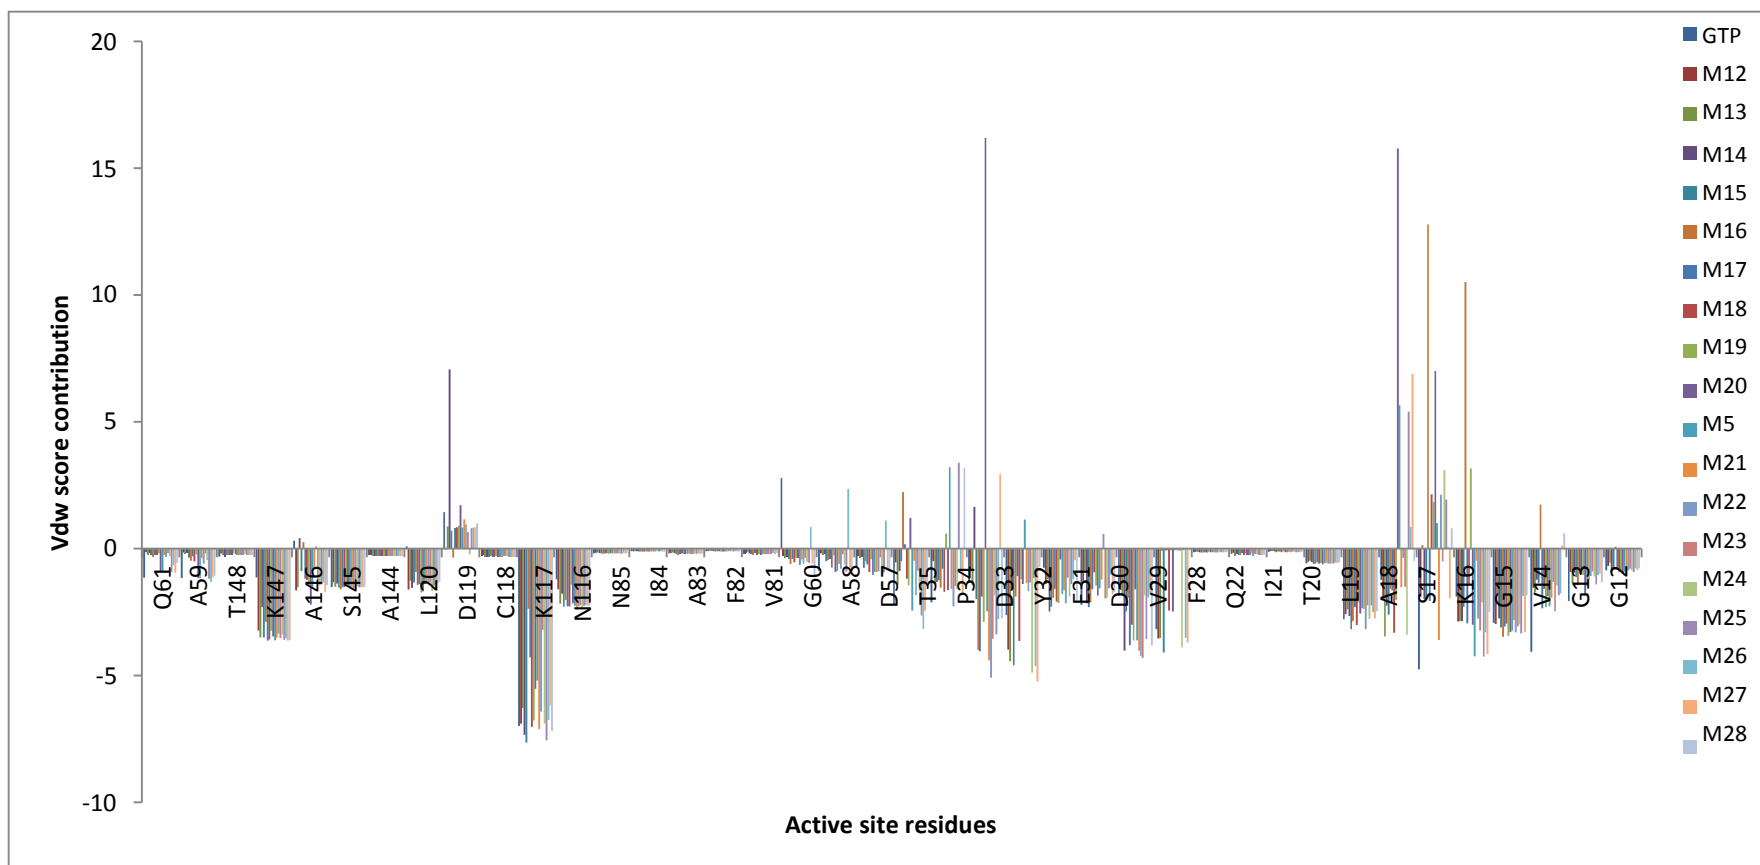

**Figure S8:** Contribution of Van der walls interaction of active site residues of the top 18 designed molecules for GTP bound conformation of K-Ras protein on glide docking.

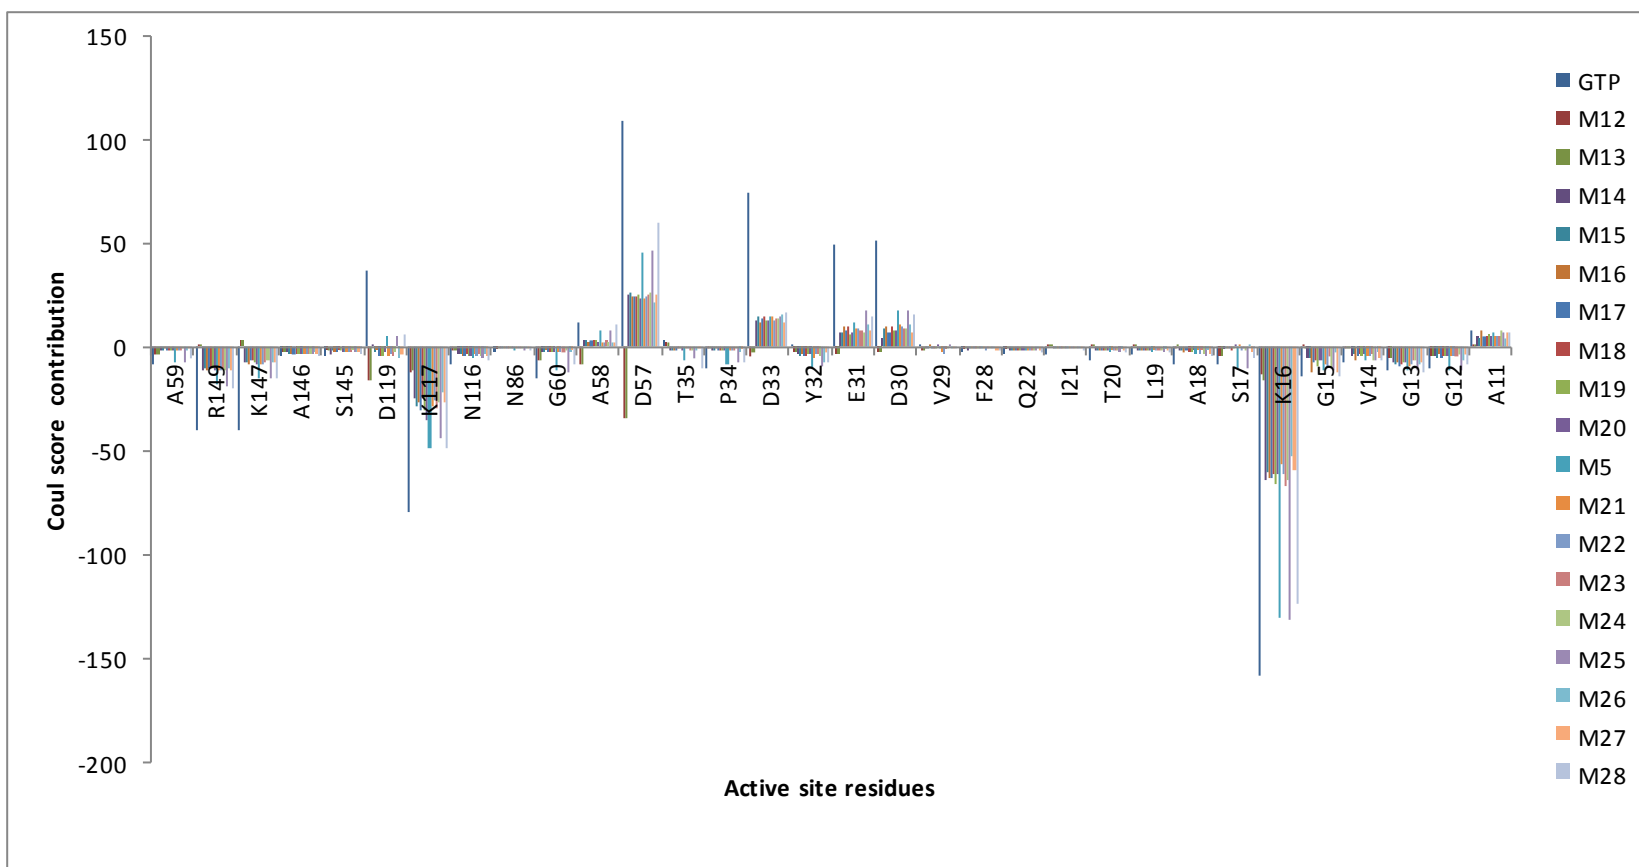

**Figure S9:** Contribution of Coulomb interaction of active site residues of the top 18 designed molecules for GTP bound conformation of K-Ras protein on glide docking

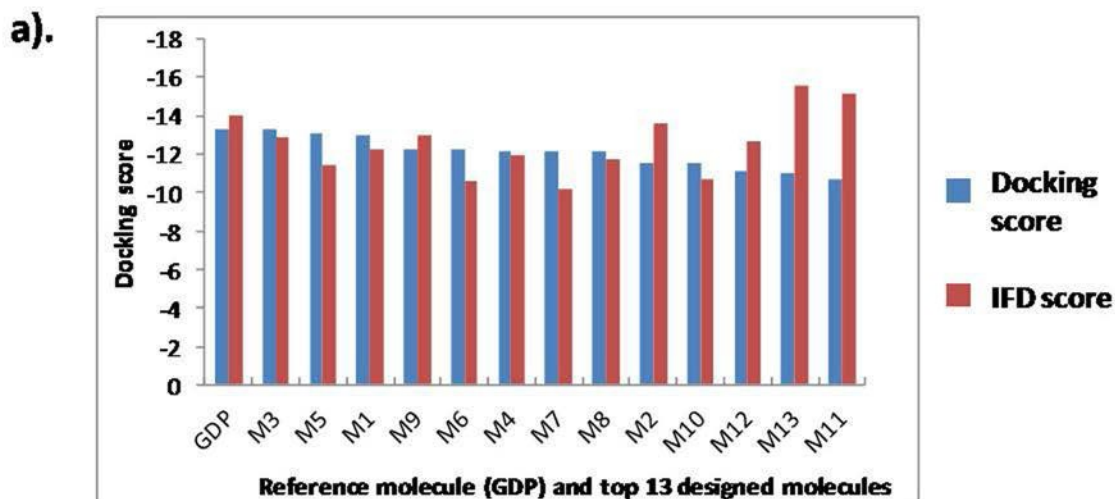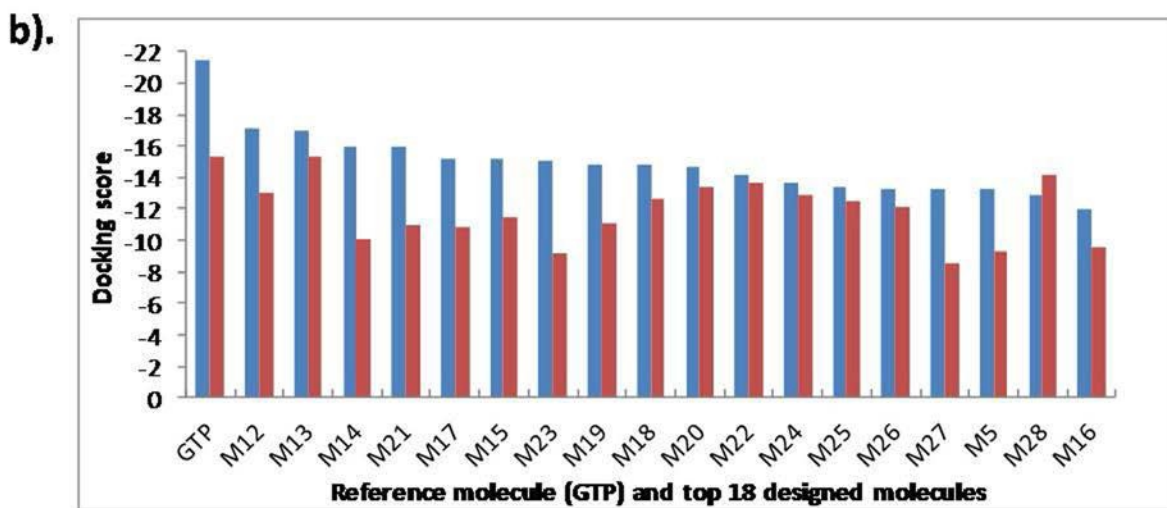

**Figure S10:** Comparison of docking methods (rigid and flexible docking) **a).** Top 13 designed molecules for GDP bound conformation of K-Ras protein. **b).** Top 18 designed molecules for GTP bound conformation of K-Ras protein



## Tables

**Table S1:** Docking score and other energy parameters of top ranked compounds in docking

**Table S2:** Contribution of interactions parameters in docking score of GDP and top 13 designed molecules

**Table S3:** Contribution of interaction parameters in docking score of GTP and top 18 designed molecules

**Table S4:** Interaction map of GDP and top 13 designed molecules

**Table S5:** Interaction map of GTP and top 18 designed molecules

**Table S6:** ADME/T properties of designed and screened top 13 GDP molecules

**Table S7:** ADME/T properties of designed and screened top 18 GTP molecules

**Table S1:** Docking score and other energy parameters of top ranked compounds in docking

| Molecules                         | Database          | Mol_id           | DockS core | LipophilicEvdW | PhobEn | PhobEnHB | PhobEnPairHB | HBond | Electro | Sitemap | Low MW | Penalties | ExposurePenalty | RotPenalty | EpikStatePenalty |      |
|-----------------------------------|-------------------|------------------|------------|----------------|--------|----------|--------------|-------|---------|---------|--------|-----------|-----------------|------------|------------------|------|
| Reference molecule                |                   | GDP              | -13.33     | -1.89          | 0.00   | -0.94    | 0.00         | -4.47 | -6.00   | 0.00    | -0.03  | 0.00      | 0.00            | 0.00       | 0.00             |      |
| Screened molecules from databases | NCI Diversity set | NSC 1945         | -9.21      | -0.64          | 0.00   | 0.00     | 0.00         | -6.8  | -2.00   | 0.00    | -0.50  | 0.00      | 0.00            | 0.73       | 0.00             |      |
|                                   | Asinex            | 70014            | -8.66      | -2.06          | 0.00   | 0.00     | -1.95        | -2.36 | -1.88   | -0.27   | -0.4   | 0.00      | 0.00            | 0.26       | 0.00             |      |
|                                   | Chembridge        | kinaSet          | 5686       | -8.42          | -2.53  | 0.00     | -1.00        | -1.95 | -1.98   | -1.19   | -0.37  | -0.39     | 0.58            | 0.10       | 0.31             | 0.00 |
|                                   |                   | kinaCore         | 6841       | -7.88          | -2.31  | -0.17    | 0.00         | -1.95 | -1.96   | -1.08   | -0.4   | -0.23     | 0.00            | 0.09       | 0.12             | 0.00 |
|                                   | DrugBank          | DB000442         | -7.61      | -1.84          | 0.00   | -1.00    | 0.00         | -2.99 | -1.09   | -0.52   | -0.50  | 0.00      | 0.13            | 0.20       | 0.00             |      |
|                                   | PubChem           | HRAS Assay       | 1085315    | -6.62          | -2.50  | 0.00     | -1.50        | 0.00  | -2.01   | -0.90   | 0.00   | -0.18     | 0.00            | 0.10       | 0.37             | 0.00 |
|                                   |                   | kinase inhibitor | 3134       | -5.11          | -1.19  | 0.00     | -1.50        | 0.00  | -1.04   | -0.43   | -0.74  | -0.50     | 0.00            | 0.00       | 0.00             | 0.29 |
|                                   | BindingDB         | 888706           | -4.55      | -1.66          | 0.00   | 0.00     | 0.00         | -1.47 | -1.25   | 0.00    | -0.50  | 0.00      | 0.00            | 0.34       | 0.00             |      |

**Dock score-** Docking score, **Lipophilic EvdW-** Lipophilic term derived from hydrophobic grid potential at hydrophobic grid potential at the hydrophobic ligand atoms, **PhobEnHB-** Hydrophobic enclosure reward, **PhobEnPairHB-** Reward for hydrophobically packed H-bond, **PhobEnPairHB-** Rewards for hydrophobically packed correlated H-bond, **HBond-** chemScore H-bond pair term, **Electro-** Electrostatic rewards; includes coulomb and metal terms, **SiteMap-** SiteMap ligand-receptor non-H-bonding polar hydrophobic terms, **LowMW-** Reward for ligands with low molecular weight, **Penalties-** polar atom burial and desolvation penalties, and penalty for intra-ligand contacts

NCI Diversity set: [https://dtp.cancer.gov/organization/dscb/obtaining/available\\_plates.htm](https://dtp.cancer.gov/organization/dscb/obtaining/available_plates.htm)

Asinex: <http://www.asinex.com/download-zone.html>

Chembridge: [http://www.chembridge.com/screening\\_libraries/targeted\\_libraries/index.php](http://www.chembridge.com/screening_libraries/targeted_libraries/index.php)

DrugBank: <http://www.drugbank.ca/downloads#structures>

PubChem: <https://pubchem.ncbi.nlm.nih.gov/bioassay/759#section=Top>, <http://www.ncbi.nlm.nih.gov/pccompound/?term=kinase+inhibitors>

BindingDB: [https://www.bindingdb.org/jsp/dbsearch/PrimarySearch\\_ki.jsp?target=ras+protein&tag=tg&kiunit=nM&icunit=nM&column=ki&submit=Search&energyterm=kJ%2Fmole](https://www.bindingdb.org/jsp/dbsearch/PrimarySearch_ki.jsp?target=ras+protein&tag=tg&kiunit=nM&icunit=nM&column=ki&submit=Search&energyterm=kJ%2Fmole)

**Table S2:** Contribution of interactions parameters in docking score of GDP and top 13 designed molecules

| Mol        | Dock Score | Lipophilic EvdW | PhobEn HB | PhobEn PairHB | HBond | Electro | Site map | Low MW | Penalties | Expos Penalty | Rot Penalty | Epik State Penalty |
|------------|------------|-----------------|-----------|---------------|-------|---------|----------|--------|-----------|---------------|-------------|--------------------|
| <b>GDP</b> | -13.33     | -1.89           | -0.94     | 0.00          | -4.47 | -6.00   | 0.00     | -0.03  | 0.0       | 0.00          | 0.00        | 0.00               |
| <b>M3</b>  | -13.30     | -1.30           | 0.00      | -1.95         | -6.36 | -3.50   | -0.50    | 0.00   | 0.0       | 0.09          | 0.17        | 0.05               |
| <b>M5</b>  | -13.05     | -1.69           | 0.00      | -1.95         | -5.69 | -3.50   | -0.51    | 0.00   | 0.0       | 0.04          | 0.18        | 0.07               |
| <b>M1</b>  | -12.94     | -1.25           | 0.00      | -1.95         | -6.11 | -3.50   | -0.48    | 0.00   | 0.0       | 0.12          | 0.18        | 0.05               |
| <b>M9</b>  | -12.25     | -1.24           | 0.00      | -1.95         | -5.43 | -3.50   | -0.48    | 0.00   | 0.0       | 0.11          | 0.18        | 0.05               |
| <b>M6</b>  | -12.21     | -1.53           | 0.00      | -1.95         | -4.93 | -3.50   | -0.54    | 0.00   | 0.0       | 0.00          | 0.18        | 0.07               |
| <b>M4</b>  | -12.18     | -1.86           | -1.00     | 0.00          | -5.95 | -3.50   | -0.47    | 0.00   | 0.0       | 0.27          | 0.27        | 0.06               |
| <b>M7</b>  | -12.12     | -2.30           | 0.00      | -1.82         | -4.47 | -3.30   | -0.52    | 0.00   | 0.0       | 0.06          | 0.24        | 0.00               |
| <b>M8</b>  | -12.12     | -2.30           | 0.00      | -1.82         | -4.47 | -3.30   | -0.52    | 0.00   | 0.0       | 0.06          | 0.24        | 0.00               |
| <b>M2</b>  | -11.51     | -1.79           | -1.00     | 0.00          | -6.58 | -3.50   | -0.43    | 0.00   | 1.5       | 0.00          | 0.26        | 0.03               |
| <b>M10</b> | -11.51     | -2.14           | 0.00      | -1.95         | -3.44 | -3.50   | -0.54    | -0.26  | 0.0       | 0.00          | 0.29        | 0.03               |
| <b>M12</b> | -11.15     | -2.03           | 0.00      | -1.95         | -3.61 | -3.50   | -0.52    | -0.12  | 0.0       | 0.02          | 0.24        | 0.31               |
| <b>M13</b> | -11.00     | -2.26           | 0.00      | -1.95         | -3.27 | -3.50   | -0.55    | 0.00   | 0.0       | 0.01          | 0.21        | 0.31               |
| <b>M11</b> | -10.65     | -2.04           | -1.00     | 0.00          | -5.72 | -2.00   | -0.49    | 0.00   | 0.0       | 0.27          | 0.31        | 0.04               |

#Order of molecules are given based on docking score ranking

**DockScore-** Docking score, **Lipophilic EvdW-** Lipophilic term derived from hydrophobic grid potential at hydrophobic grid potential at the hydrophobic ligand atoms, **PhobEn HB-** Hydrophobic enclosure reward, **PhobEnPairHB-** Reward for hydrophobically packed H-bond, **PhobEnPairHB-** Rewards for hydrophobically packed correlated H-bond, **HBond-** chemScore H-bond pair term, **Electro-** Electrostatic rewards; includes coulomb and metal terms, **SiteMap-** SiteMap ligand-receptor non-H-bonding polar hydrophobic terms, **LowMW-** Reward for ligands with low molecular weight, **Penalties-** polar atom burial and desolvation penalties, and penalty for intra-ligand contacts.

**Table S3:** Contribution of interaction parameters in docking score of GTP and top 18 designed molecules.

| Mol | DockScore | Lipophilic<br>EvdW | PhobEn<br>PairHB | HBond | Electro | Sitemap | LowMW | ExposPenal | RotPenal | EpikState<br>Penalty |
|-----|-----------|--------------------|------------------|-------|---------|---------|-------|------------|----------|----------------------|
| GTP | -21.47    | -1.47              | -3.29            | -7.70 | -7.0    | 0.00    | 0.00  | 0.00       | 0.00     | 0.00                 |
| M12 | -17.06    | -2.61              | -5.06            | -4.73 | -4.5    | -0.59   | -0.12 | 0.00       | 0.24     | 0.31                 |
| M13 | -17.00    | -2.66              | -5.11            | -4.71 | -4.5    | -0.53   | 0.00  | 0.00       | 0.21     | 0.31                 |
| M14 | -15.90    | -1.75              | -7.47            | -4.50 | -2.0    | -0.43   | -0.07 | 0.08       | 0.19     | 0.04                 |
| M21 | -15.89    | -2.28              | -6.74            | -4.61 | -2.0    | -0.51   | 0.00  | 0.00       | 0.21     | 0.04                 |
| M17 | -15.17    | -1.99              | -7.03            | -4.03 | -2.0    | -0.54   | 0.00  | 0.17       | 0.21     | 0.04                 |
| M15 | -15.14    | -2.52              | -7.15            | -3.34 | -2.0    | -0.35   | -0.14 | 0.07       | 0.25     | 0.04                 |
| M23 | -15.04    | -2.34              | -6.35            | -4.21 | -2.0    | -0.30   | -0.07 | 0.00       | 0.19     | 0.04                 |
| M19 | -14.86    | -1.87              | -7.15            | -3.88 | -2.0    | -0.24   | -0.01 | 0.07       | 0.18     | 0.04                 |
| M18 | -14.85    | -2.48              | -7.15            | -3.05 | -2.0    | -0.09   | -0.35 | 0.00       | 0.24     | 0.03                 |
| M20 | -14.68    | -2.41              | -7.13            | -2.97 | -2.0    | -0.32   | -0.14 | 0.00       | 0.25     | 0.04                 |
| M22 | -14.14    | -2.49              | -6.10            | -3.46 | -2.0    | -0.29   | -0.02 | 0.00       | 0.21     | 0.00                 |
| M24 | -13.62    | -1.77              | -5.20            | -4.35 | -2.0    | -0.62   | -0.02 | 0.11       | 0.18     | 0.04                 |
| M25 | -13.45    | -2.14              | -1.89            | -7.18 | -2.0    | -0.45   | 0.00  | 0.00       | 0.18     | 0.03                 |
| M26 | -13.31    | -2.65              | -5.09            | -3.18 | -2.0    | -0.33   | -0.27 | 0.00       | 0.21     | 0.00                 |
| M27 | -13.29    | -2.06              | -5.01            | -3.96 | -2.0    | -0.49   | -0.04 | 0.07       | 0.19     | 0.00                 |
| M5  | -13.24    | -2.21              | -1.85            | -7.06 | -2.0    | -0.36   | 0.00  | 0.00       | 0.18     | 0.07                 |
| M28 | -12.83    | -1.87              | -1.78            | -7.08 | -2.0    | -0.35   | 0.00  | 0.00       | 0.19     | 0.06                 |
| M16 | -12.05    | -1.41              | -5.20            | -3.30 | -2.0    | -0.29   | -0.03 | 0.00       | 0.19     | 0.00                 |

#Order of molecules are given based on docking score ranking

**DockScore-** Docking score, **Lipophilic EvdW-** Lipophilic term derived from hydrophobic grid potential at hydrophobic grid potential at the hydrophobic ligand atoms, **PhobEnHB-** Hydrophobic enclosure reward, **PhobEnPairHB-** Reward for hydrophobically packed H-bond, **PhobEnPairHB-** Rewards for hydrophobically packed correlated H-bond, **HBond-** chemScore H-bond pair term, **Electro-** Electrostatic rewards; includes coulomb and metal terms, **SiteMap-** SiteMap ligand-receptor non-H-bonding polar hydrophobic terms, **LowMW-** Reward for ligands with low molecular weight, **Penalties-** polar atom burial and desolvation penalties, and penalty for intra-ligand contact

**Table S4:** Interaction map of GDP and top 13 designed molecules

| Mol | G13 | V14 | G15 | K16  | S17 | A18 | F28 | V29 | D30 | D33 | I36 | D57 | T58 | N116 | K117 | D119 | A146 |
|-----|-----|-----|-----|------|-----|-----|-----|-----|-----|-----|-----|-----|-----|------|------|------|------|
| GDP | √   | √   | √   | √, o | √   | √   | x   |     | √   |     | √   |     |     | √    | √, x | √    | √    |
| M1  |     | √   |     | √    | √   | √   | x   |     | √   | √   | √   | o   |     | √    | √, x | √    | √    |
| M2  |     | √   |     | √    | √   | √   | x   | √   |     | √   | √   | o   |     | √    | x    | √    | √    |
| M3  |     | √   |     | √    | √   | √   | x   | √   |     | √   | √   | o   |     | √    | √    | √    | √    |
| M4  |     | √   |     | √    | √   | √   | x   |     |     | √   | √   | o   |     | √    | x    | √    | √    |
| M5  | √   | √   | √   | √, o | √   |     | x   |     |     | √   | √   | o   |     | √    | x    | √    | √    |
| M6  | √   |     | √   | √, o | √   | √   | x   | √   |     |     |     | o   |     | √    | x, o | √    | √    |
| M7  | √   |     |     |      |     |     | x   |     | √   |     | √   | o   | √   | √    | √    | √    | √    |
| M8  |     |     |     | √    | √   |     | x   |     | √   |     | √   | o   | √   | √    | √    | √    | √    |
| M9  |     | √   |     | √    | √   | √   | x   |     |     | √   | √   | o   |     | √    | √, x | √    | √    |
| M10 | √   |     |     |      | √   |     |     |     |     |     | √   |     | √   | √    | √    | √    | √    |
| M11 | √   |     | √   | √    |     |     | x   |     | √   |     |     |     |     | √    | √, x | √    | √    |
| M12 | √   |     |     | √    | √   |     |     |     |     |     |     |     |     | √    | √    | √    | √    |
| M13 | √   |     |     | √    | √   |     | x   |     |     |     | √   | o   | √   | √    | √    | √    | √    |

“√” represents H-bond interaction, “x” represents hydrophobic interaction and “o” represents salt bridge

**Table S5:** Interaction map of GTP and top 18 designed molecules

| Mol | G13 | V14 | G15 | K16  | S17 | A18 | F28 | V29 | D30 | E31 | Y32 | D33 | T35 | I36 | D57 | T58 | G60 | N116 | K117 | D119 | S145 | A146 | K147 |
|-----|-----|-----|-----|------|-----|-----|-----|-----|-----|-----|-----|-----|-----|-----|-----|-----|-----|------|------|------|------|------|------|
| GTP | √   | √   | √   | √, o | √   | √   | X   | √   | √   |     |     |     | √   |     |     |     | √   | √    | √, x | √    |      | √    |      |
| M12 | √   |     |     | o    | √   |     | x   |     |     |     | x   |     |     |     | √   | √   | √   | √    | √    | √    |      | √    |      |
| M13 | √   |     |     | √    | √   |     | x   |     |     |     | √   |     |     |     | √   | √   | √   | √    | x    | √    |      | √    |      |
| M14 | √   |     | √   | √    |     |     | x   |     | √   |     | √   |     |     |     |     |     |     | √    | √    | √    | √    |      | √    |
| M15 | √   |     | √   | √    |     |     | x   |     |     | √   | √   |     |     |     |     |     |     | √    | √    | √    | √    |      | √    |
| M16 |     | √   | √   | √    |     |     | x   |     |     | √   |     |     |     |     |     |     |     | √    | x    | √    | √    |      | √    |
| M17 |     |     | √   | √    |     |     | x   |     |     | √   |     |     |     |     |     |     |     | √    | √    | √    | √    |      | √    |
| M18 | √   |     | √   | √    |     |     | x   |     |     |     | x   |     |     |     |     |     |     | √    | x    | √    | √    |      | √    |
| M19 | √   |     | √   | √    |     |     | x   |     |     | √   | x   |     |     |     |     |     |     | √    | x    | √    | √    |      | √    |
| M20 | √   |     | √   | √, o |     |     | x   |     |     |     | √   |     |     |     |     |     |     | √    | √, x | √    | √    |      | √    |
| M5  | √   |     | √   | √, o | √   |     | x   |     |     | √   | √   |     | √   |     |     |     | √   | √    | x    | √    | √    |      | √    |
| M21 | √   |     | √   | √    |     |     | x   | √   |     | √   | √   |     |     |     |     |     |     | √    | √, x | √    | √    |      | √    |
| M22 | √   |     | √   | √, o |     |     | x   | √   |     |     | √   |     |     |     |     |     |     | √    |      | √    | √    |      | √    |
| M23 | √   |     | √   | √    |     | √   | x   |     | √   |     |     |     |     |     |     |     |     | √    | x    | √    | √    |      | √    |
| M24 |     | √   | √   | √    |     | √   | x   |     |     | √   |     |     |     |     |     |     |     | √    | x    | √    | √    |      | √    |
| M25 | √   |     | √   | √, o | √   |     | x   |     |     |     |     | √   | √   |     |     |     | √   | √    | x    | √    | √    |      | √    |
| M26 |     |     |     | o    |     |     | x   |     |     |     | √   |     |     |     |     |     |     | √    | √    | √    | √    |      | √    |
| M27 | √   | √   | √   | √    |     | √   | x   |     | √   |     | x   |     |     |     |     |     |     | √    |      | √    | √    |      | √    |
| M28 | √   |     | √   | √, o | √   |     | x   |     |     | √   | √   | √   | √   |     | √   |     | √   | √    | x    | √    | √    |      | √    |

“√” represents H-bonding interaction, “x” represents hydrophobic interaction and “o” represents salt bridge

\

**Table S6:** ADME/T properties of designed and screened top 13 GDP molecules

| Title        | #stars | #amine | #acid | #rotor | #rtv<br>FG | CNS | mol<br>MW | dipole | SASA   | FOSA   | FISA   | PISA   | WPSA  | volume  | donor<br>HB | accept<br>HB |
|--------------|--------|--------|-------|--------|------------|-----|-----------|--------|--------|--------|--------|--------|-------|---------|-------------|--------------|
| 4OBE<br>_GDP | 6      | 0      | 3     | 11     | 2          | -2  | 443.20    | 17.98  | 612.74 | 80.37  | 493.50 | 035.65 | 03.23 | 1081.45 | 5           | 17.60        |
| M1           | 7      | 1      | 3     | 16     | 2          | -2  | 524.36    | 05.79  | 712.37 | 184.21 | 497.09 | 030.81 | 00.26 | 1334.74 | 7           | 17.95        |
| M2           | 7      | 1      | 3     | 16     | 1          | -2  | 522.39    | 11.00  | 721.00 | 217.35 | 449.59 | 053.41 | 00.65 | 1349.04 | 7           | 15.95        |
| M3           | 6      | 1      | 3     | 15     | 2          | -2  | 510.34    | 06.71  | 718.96 | 162.22 | 512.46 | 042.43 | 01.85 | 1302.92 | 7           | 17.95        |
| M4           | 7      | 1      | 3     | 16     | 1          | -2  | 512.35    | 03.63  | 706.41 | 240.18 | 436.44 | 029.46 | 00.33 | 1303.64 | 7           | 17.65        |
| M5           | 9      | 1      | 3     | 16     | 1          | -2  | 528.41    | 17.59  | 713.38 | 198.54 | 452.36 | 044.85 | 17.64 | 1331.37 | 7           | 16.45        |
| M6           | 8      | 1      | 3     | 16     | 1          | -2  | 528.41    | 15.74  | 716.82 | 203.42 | 442.46 | 043.12 | 27.82 | 1334.78 | 7           | 16.45        |
| M7           | 7      | 1      | 0     | 12     | 0          | -2  | 502.49    | 15.11  | 765.52 | 216.95 | 392.91 | 155.67 | 00.00 | 1408.21 | 8           | 17.30        |
| M8           | 7      | 1      | 0     | 10     | 0          | -2  | 472.46    | 16.18  | 739.89 | 169.86 | 410.98 | 159.05 | 00.00 | 1339.89 | 8           | 15.60        |
| M9           | 7      | 1      | 3     | 16     | 2          | -2  | 524.36    | 05.10  | 720.48 | 187.83 | 499.04 | 033.20 | 00.42 | 1339.68 | 7           | 17.95        |
| M10          | 2      | 1      | 0     | 08     | 0          | -2  | 370.37    | 11.45  | 658.32 | 129.90 | 355.14 | 173.28 | 00.00 | 1129.54 | 6           | 10.50        |
| M11          | 2      | 0      | 1     | 11     | 0          | -2  | 475.52    | 14.03  | 705.09 | 217.83 | 328.14 | 125.68 | 33.45 | 1319.93 | 6           | 13.10        |
| M12          | 5      | 1      | 1     | 09     | 0          | -2  | 414.38    | 16.65  | 682.89 | 80.58  | 423.46 | 178.85 | 00.00 | 1188.16 | 5           | 10.50        |
| M13          | 4      | 1      | 1     | 09     | 0          | -2  | 450.36    | 11.17  | 691.99 | 77.53  | 425.95 | 126.03 | 62.48 | 1214.96 | 5           | 10.50        |

| Title | dip <sup>2</sup><br>/V | ACxDN<br><sup>1.5</sup> /SA | glob | QPpolrz | QPlog<br>PC16 | QPlog<br>Poct | QPlogPw | QPlog<br>Po/w | QPlogS | CIQP<br>logS | QPlog<br>HERG | QPPC<br>aco | QPlog<br>BB | QPPM<br>DCK | QPlogK<br>p |
|-------|------------------------|-----------------------------|------|---------|---------------|---------------|---------|---------------|--------|--------------|---------------|-------------|-------------|-------------|-------------|
| 4OBE  |                        |                             |      |         |               |               |         |               |        |              |               |             |             |             |             |
| _GDP  | 0.30                   | 0.06                        | 0.83 | 30.40   | 13.14         | 31.95         | 27.03   | -2.69         | -1.25  | -2.05        | 1.00          | 0.00        | -4.85       | 0.00        | -9.43       |
| M1    | 0.03                   | 0.07                        | 0.82 | 37.28   | 15.92         | 33.58         | 29.43   | -4.14         | -1.01  | -2.20        | 0.15          | 0.00        | -4.90       | 0.00        | -11.10      |
| M2    | 0.09                   | 0.06                        | 0.82 | 38.07   | 15.88         | 33.45         | 27.31   | -3.08         | -1.41  | -2.84        | -0.02         | 0.00        | -4.47       | 0.00        | -10.14      |
| M3    | 0.03                   | 0.07                        | 0.80 | 36.76   | 15.88         | 33.56         | 29.85   | -4.46         | -1.25  | -1.96        | -0.24         | 0.00        | -5.24       | 0.00        | -11.44      |
| M4    | 0.01                   | 0.07                        | 0.82 | 36.03   | 15.21         | 32.43         | 28.70   | -3.80         | -1.00  | -2.09        | 0.06          | 0.00        | -4.36       | 0.00        | -09.99      |
| M5    | 0.23                   | 0.06                        | 0.82 | 37.28   | 15.80         | 35.49         | 27.75   | -3.29         | -1.33  | -2.78        | 0.05          | 0.00        | -4.44       | 0.00        | -10.23      |
| M6    | 0.19                   | 0.06                        | 0.82 | 37.40   | 15.83         | 34.88         | 27.68   | -3.17         | -1.41  | -2.78        | 0.01          | 0.00        | -4.34       | 0.00        | -10.05      |
| M7    | 0.16                   | 0.06                        | 0.79 | 43.98   | 17.05         | 38.62         | 31.40   | -2.57         | -1.67  | -2.35        | -6.34         | 0.46        | -3.92       | 0.14        | -09.12      |
| M8    | 0.20                   | 0.06                        | 0.79 | 42.57   | 16.57         | 37.80         | 30.25   | -2.50         | -1.97  | -2.41        | -6.34         | 0.31        | -3.98       | 0.09        | -09.64      |
| M9    | 0.02                   | 0.07                        | 0.82 | 37.50   | 16.01         | 33.56         | 29.48   | -4.15         | -1.09  | -2.20        | 0.02          | 0.00        | -5.00       | 0.00        | -11.13      |
| M10   | 0.12                   | 0.04                        | 0.80 | 35.57   | 13.79         | 28.37         | 22.26   | -1.30         | -2.17  | -2.39        | -6.37         | 1.06        | -3.25       | 0.33        | -08.75      |
| M11   | 0.15                   | 0.05                        | 0.83 | 40.81   | 15.27         | 32.09         | 23.78   | 0.27          | -3.21  | -4.45        | -3.15         | 1.94        | -3.23       | 1.12        | -06.07      |
| M12   | 0.23                   | 0.03                        | 0.79 | 37.33   | 14.67         | 29.46         | 21.14   | -2.65         | -3.07  | -3.21        | -4.63         | 0.06        | -4.05       | 0.02        | -09.89      |
| M13   | 0.10                   | 0.03                        | 0.80 | 37.89   | 14.16         | 28.12         | 20.84   | -2.33         | -3.47  | -3.87        | -4.36         | 0.06        | -3.91       | 0.04        | -10.12      |



| Title        | IP(eV) | EA(eV) | #metab | QPlog<br>Khsa | Human<br>OralAbs<br>orption | %Human<br>OralAbsor<br>ption | SAfluori<br>ne | PSA    | #Nan<br>dO | RuleOf<br>Five | RuleOf<br>Three | #ring<br>atoms | #in5<br>6 | #no<br>nc<br>n | #nonH<br>atm |
|--------------|--------|--------|--------|---------------|-----------------------------|------------------------------|----------------|--------|------------|----------------|-----------------|----------------|-----------|----------------|--------------|
| 4OBE_<br>GDP | 8.22   | 0.08   | 3      | -2.04         | 1                           | 0.00                         | 0.00           | 264.45 | 16         | 2              | 1               | 14             | 14        | 4              | 28           |
| M1           | 8.54   | 0.07   | 6      | -1.87         | 1                           | 0.00                         | 0.00           | 288.22 | 16         | 3              | 1               | 14             | 14        | 4              | 34           |
| M2           | 8.35   | -0.08  | 6      | -1.65         | 1                           | 0.00                         | 0.00           | 255.79 | 15         | 3              | 1               | 14             | 14        | 4              | 34           |
| M3           | 8.67   | 0.18   | 6      | -1.95         | 1                           | 0.00                         | 0.00           | 287.30 | 16         | 3              | 1               | 14             | 14        | 4              | 33           |
| M4           | 8.30   | -0.15  | 5      | -1.91         | 1                           | 0.00                         | 0.00           | 259.12 | 16         | 3              | 1               | 14             | 14        | 4              | 33           |
| M5           | 8.18   | 0.24   | 4      | -1.73         | 1                           | 0.00                         | 0.00           | 257.97 | 15         | 3              | 1               | 14             | 14        | 4              | 33           |
| M6           | 8.56   | 0.39   | 4      | -1.73         | 1                           | 0.00                         | 0.00           | 256.00 | 15         | 3              | 1               | 14             | 14        | 4              | 33           |
| M7           | 8.47   | 0.39   | 8      | -1.14         | 1                           | 0.00                         | 0.00           | 248.24 | 15         | 3              | 2               | 20             | 20        | 4              | 36           |
| M8           | 8.35   | 0.42   | 7      | -0.98         | 1                           | 0.00                         | 0.00           | 239.36 | 14         | 2              | 2               | 20             | 20        | 4              | 34           |
| M9           | 8.54   | 0.09   | 6      | -1.89         | 1                           | 0.00                         | 0.00           | 289.00 | 16         | 3              | 1               | 14             | 14        | 4              | 34           |
| M10          | 8.57   | 0.56   | 4      | -0.67         | 1                           | 0.00                         | 0.00           | 198.13 | 11         | 2              | 1               | 15             | 15        | 0              | 27           |
| M11          | 8.53   | 0.10   | 5      | -0.82         | 1                           | 7.73                         | 0.00           | 186.40 | 11         | 2              | 1               | 20             | 20        | 4              | 33           |
| M12          | 8.67   | 0.65   | 4      | -0.72         | 1                           | 0.00                         | 0.00           | 238.46 | 13         | 2              | 1               | 15             | 15        | 0              | 30           |
| M13          | 8.67   | 0.89   | 4      | -0.66         | 1                           | 0.00                         | 62.48          | 237.77 | 13         | 2              | 1               | 15             | 15        | 0              | 32           |

**Table S7:** ADME/T properties of designed and screened top 18 GTP molecules

| Title        | #stars | #amine | #acid | #rotor | #rtvFG | CNS | mol MW | dipole | SASA   | FOSA   | FISA   | PISA   | WPSA  | volume  | donor HB | acptH B |
|--------------|--------|--------|-------|--------|--------|-----|--------|--------|--------|--------|--------|--------|-------|---------|----------|---------|
| 4DSO_<br>GTP | 7      | 0      | 4     | 14     | 3      | -2  | 523.18 | 15.25  | 695.97 | 083.97 | 568.69 | 36.27  | 07.04 | 1229.07 | 5        | 21.60   |
| M12          | 4      | 1      | 1     | 09     | 0      | -2  | 414.38 | 07.43  | 690.40 | 084.61 | 438.06 | 167.73 | 00.00 | 1192.12 | 5        | 10.50   |
| M13          | 5      | 1      | 1     | 09     | 0      | -2  | 450.36 | 13.11  | 682.15 | 073.40 | 430.07 | 125.55 | 53.14 | 1201.29 | 5        | 10.50   |
| M14          | 4      | 0      | 1     | 09     | 0      | -2  | 431.40 | 16.84  | 640.90 | 117.50 | 356.99 | 166.41 | 00.00 | 1178.03 | 6        | 13.35   |
| M15          | 0      | 0      | 1     | 09     | 0      | -2  | 409.46 | 11.36  | 681.60 | 311.85 | 296.47 | 037.27 | 36.02 | 1202.78 | 5        | 11.40   |
| M16          | 0      | 0      | 1     | 08     | 0      | -2  | 441.50 | 11.23  | 695.59 | 191.12 | 296.13 | 205.11 | 03.23 | 1271.24 | 5        | 09.70   |
| M17          | 2      | 0      | 1     | 07     | 0      | -2  | 452.48 | 12.26  | 718.09 | 304.71 | 345.54 | 044.23 | 23.61 | 1289.54 | 5        | 12.20   |
| M18          | 0      | 0      | 1     | 07     | 0      | -2  | 345.38 | 08.35  | 598.14 | 109.01 | 290.67 | 162.46 | 35.99 | 1013.40 | 4        | 08.00   |
| M19          | 0      | 0      | 1     | 08     | 0      | -2  | 447.53 | 10.89  | 680.56 | 148.37 | 312.60 | 179.24 | 40.35 | 1238.71 | 5        | 10.20   |
| M20          | 4      | 0      | 1     | 10     | 0      | -2  | 409.40 | 14.83  | 666.96 | 253.25 | 368.71 | 045.01 | 00.00 | 1191.96 | 6        | 14.30   |
| M5           | 7      | 1      | 3     | 16     | 1      | -2  | 528.41 | 03.92  | 732.47 | 173.77 | 492.04 | 036.36 | 30.30 | 1372.01 | 7        | 16.45   |
| M21          | 3      | 0      | 1     | 08     | 0      | -2  | 452.42 | 07.72  | 694.92 | 275.90 | 385.26 | 033.76 | 00.00 | 1262.72 | 6        | 15.10   |
| M22          | 1      | 0      | 1     | 07     | 0      | -2  | 446.46 | 14.10  | 709.99 | 353.95 | 301.08 | 054.96 | 00.00 | 1298.20 | 5        | 11.70   |
| M23          | 2      | 0      | 1     | 08     | 0      | -2  | 431.47 | 11.43  | 650.22 | 093.39 | 336.28 | 187.01 | 33.54 | 1175.86 | 5        | 10.45   |
| M24          | 0      | 0      | 1     | 08     | 0      | -2  | 445.45 | 11.37  | 659.41 | 126.08 | 329.06 | 170.17 | 34.11 | 1212.42 | 5        | 13.40   |
| M25          | 9      | 1      | 3     | 16     | 2      | -2  | 524.36 | 16.93  | 741.83 | 164.13 | 533.60 | 042.19 | 01.91 | 1361.93 | 7        | 17.95   |
| M26          | 0      | 0      | 1     | 08     | 0      | -2  | 371.35 | 06.68  | 622.36 | 205.47 | 291.58 | 125.31 | 00.00 | 1091.45 | 4        | 09.00   |
| M27          | 3      | 0      | 1     | 08     | 0      | -2  | 439.43 | 13.40  | 702.53 | 146.83 | 351.93 | 203.77 | 00.00 | 1264.07 | 5        | 12.90   |
| M28          | 7      | 1      | 3     | 16     | 1      | -2  | 512.35 | 06.90  | 723.97 | 213.60 | 467.76 | 041.32 | 01.29 | 1341.07 | 7        | 17.65   |

| Title | dip <sup>2</sup> /<br>V | ACxDN<br>^5/SA | glob | QPpol<br>rz | QPlogP<br>C16 | QPlogP<br>oct | QPlogP<br>w | QPlogPo<br>/w | QPlogS | CIQPlo<br>gS | QPlogHE<br>RG | QPPCa<br>co | QPlog<br>BB | QPPMD<br>CK | QPlog<br>Kp |
|-------|-------------------------|----------------|------|-------------|---------------|---------------|-------------|---------------|--------|--------------|---------------|-------------|-------------|-------------|-------------|
| 4DSO_ |                         |                |      |             |               |               |             |               |        |              |               |             |             |             |             |
| GTP   | 0.19                    | 0.07           | 0.80 | 34.39       | 15.12         | 34.20         | 31.02       | -3.43         | -0.78  | -1.98        | 2.25          | 0.00        | -6.23       | 0.00        | -10.53      |
| M12   | 0.05                    | 0.03           | 0.79 | 37.38       | 14.74         | 26.94         | 21.18       | -2.75         | -3.17  | -3.21        | -4.69         | 0.04        | -4.29       | 0.01        | -10.20      |
| M13   | 0.14                    | 0.03           | 0.80 | 37.34       | 14.11         | 28.47         | 20.84       | -2.47         | -3.29  | -3.87        | -4.27         | 0.05        | -3.92       | 0.03        | -10.20      |
| M14   | 0.24                    | 0.05           | 0.84 | 36.80       | 14.22         | 32.21         | 24.77       | -0.82         | -2.60  | -3.61        | -3.08         | 1.03        | -3.34       | 0.37        | -6.65       |
| M15   | 0.11                    | 0.04           | 0.80 | 36.56       | 13.15         | 27.30         | 20.21       | 0.40          | -3.59  | -3.56        | -3.10         | 3.87        | -2.96       | 2.45        | -5.99       |
| M16   | 0.10                    | 0.03           | 0.82 | 41.54       | 14.73         | 28.24         | 19.92       | 1.47          | -4.14  | -5.07        | -3.68         | 3.90        | -2.88       | 1.63        | -5.49       |
| M17   | 0.12                    | 0.04           | 0.80 | 41.38       | 14.30         | 29.82         | 21.90       | 0.22          | -4.19  | -4.09        | -3.21         | 1.33        | -3.42       | 0.66        | -7.06       |
| M18   | 0.07                    | 0.03           | 0.82 | 31.46       | 11.92         | 21.95         | 16.45       | 0.83          | -3.45  | -3.91        | -3.48         | 4.40        | -2.68       | 2.81        | -5.63       |
| M19   | 0.10                    | 0.03           | 0.82 | 39.99       | 14.62         | 28.15         | 20.32       | 1.11          | -3.99  | -5.01        | -3.50         | 2.72        | -2.92       | 1.77        | -5.88       |
| M20   | 0.18                    | 0.05           | 0.82 | 35.56       | 13.57         | 31.24         | 24.81       | -1.35         | -2.58  | -2.58        | -2.93         | 0.80        | -3.74       | 0.28        | -7.20       |
| M5    | 0.01                    | 0.06           | 0.82 | 38.83       | 16.49         | 33.23         | 28.01       | -3.33         | -1.59  | -2.78        | 0.00          | 0.00        | -4.86       | 0.00        | -10.99      |
| M21   | 0.05                    | 0.05           | 0.81 | 39.57       | 14.28         | 31.34         | 26.14       | -1.37         | -3.09  | -3.07        | -2.91         | 0.56        | -3.80       | 0.19        | -7.73       |
| M22   | 0.15                    | 0.04           | 0.81 | 41.83       | 13.94         | 29.94         | 21.15       | 0.70          | -4.08  | -4.16        | -3.05         | 3.50        | -2.91       | 1.40        | -6.20       |
| M23   | 0.11                    | 0.04           | 0.83 | 37.55       | 14.20         | 27.75         | 20.71       | 0.51          | -3.50  | -4.63        | -3.39         | 1.62        | -3.10       | 0.93        | -6.29       |
| M24   | 0.11                    | 0.05           | 0.83 | 38.86       | 14.38         | 29.71         | 23.47       | -0.24         | -3.08  | -3.88        | -3.22         | 1.90        | -2.99       | 1.11        | -6.22       |
| M25   | 0.21                    | 0.06           | 0.80 | 38.48       | 16.58         | 36.66         | 29.83       | -4.31         | -1.31  | -2.20        | -0.26         | 0.00        | -5.54       | 0.00        | -11.73      |
| M26   | 0.04                    | 0.03           | 0.82 | 33.59       | 12.18         | 22.63         | 17.01       | 0.76          | -3.28  | -4.05        | -3.17         | 4.31        | -2.78       | 1.75        | -5.68       |
| M27   | 0.14                    | 0.04           | 0.80 | 41.24       | 15.04         | 30.66         | 23.45       | -0.10         | -3.57  | -3.94        | -3.86         | 1.15        | -3.54       | 0.42        | -6.52       |
| M28   | 0.04                    | 0.06           | 0.81 | 37.64       | 15.88         | 33.52         | 29.03       | -3.83         | -1.18  | -2.09        | -0.07         | 0.00        | -4.73       | 0.00        | -10.52      |

| Title        | IP(eV) | EA(eV) | #meta<br>b | QPlogKhsa | HumanOral<br>Absorption | PercentHum<br>anOralAbsorp<br>tion | SAfluor<br>ine | PSA    | #Na<br>ndO | Rule<br>OfFive | RuleOfT<br>hree | #ring<br>atoms | #in56 | #nonc<br>on | #nonH<br>atm |
|--------------|--------|--------|------------|-----------|-------------------------|------------------------------------|----------------|--------|------------|----------------|-----------------|----------------|-------|-------------|--------------|
| 4DSO_<br>GTP | 8.17   | 0.32   | 3          | -2.74     | 1.00                    | 00.00                              | 00.00          | 313.09 | 19         | 3              | 1               | 14             | 14    | 4           | 32           |
| M12          | 8.61   | 0.43   | 4          | -0.72     | 1.00                    | 00.00                              | 00.00          | 237.31 | 13         | 2              | 1               | 15             | 15    | 0           | 30           |
| M13          | 8.77   | 1.14   | 4          | -0.68     | 1.00                    | 00.00                              | 53.14          | 235.26 | 13         | 2              | 1               | 15             | 15    | 0           | 32           |
| M14          | 8.44   | 0.81   | 4          | -0.97     | 1.00                    | 00.00                              | 00.00          | 200.31 | 12         | 2              | 1               | 20             | 20    | 4           | 31           |
| M15          | 8.59   | 0.45   | 6          | -0.79     | 2.00                    | 39.78                              | 00.00          | 165.85 | 10         | 0              | 1               | 14             | 14    | 4           | 28           |
| M16          | 8.38   | 0.42   | 3          | -0.36     | 2.00                    | 46.12                              | 00.00          | 160.95 | 09         | 0              | 1               | 20             | 20    | 4           | 31           |
| M17          | 8.62   | 0.43   | 2          | -0.64     | 1.00                    | 17.46                              | 00.00          | 198.42 | 12         | 1              | 1               | 19             | 19    | 8           | 31           |
| M18          | 8.62   | 0.52   | 2          | -0.62     | 2.00                    | 43.31                              | 00.00          | 144.62 | 08         | 0              | 1               | 15             | 15    | 0           | 24           |
| M19          | 8.58   | 0.67   | 1          | -0.49     | 1.00                    | 41.25                              | 00.00          | 162.24 | 09         | 0              | 1               | 20             | 20    | 4           | 30           |
| M20          | 8.22   | -0.21  | 8          | -1.16     | 1.00                    | 00.00                              | 00.00          | 200.23 | 12         | 2              | 2               | 14             | 14    | 4           | 29           |
| M5           | 8.46   | 0.22   | 4          | -1.68     | 1.00                    | 00.00                              | 00.00          | 267.27 | 15         | 3              | 1               | 14             | 14    | 4           | 33           |
| M21          | 8.54   | 0.04   | 4          | -1.06     | 1.00                    | 00.00                              | 00.00          | 225.30 | 14         | 2              | 1               | 19             | 19    | 8           | 32           |
| M22          | 8.09   | -0.35  | 4          | -0.53     | 2.00                    | 27.82                              | 00.00          | 188.58 | 12         | 1              | 1               | 19             | 19    | 8           | 32           |
| M23          | 8.71   | 0.87   | 2          | -0.63     | 1.00                    | 33.68                              | 00.00          | 175.88 | 10         | 0              | 1               | 20             | 20    | 4           | 30           |
| M24          | 8.68   | 0.62   | 3          | -0.90     | 1.00                    | 17.59                              | 00.00          | 190.54 | 11         | 1              | 1               | 20             | 20    | 4           | 31           |
| M25          | 8.50   | 0.08   | 6          | -1.91     | 1.00                    | 00.00                              | 00.00          | 291.84 | 16         | 3              | 1               | 14             | 14    | 4           | 34           |
| M26          | 8.54   | 0.72   | 4          | -0.61     | 2.00                    | 42.75                              | 00.00          | 161.08 | 10         | 0              | 1               | 15             | 15    | 0           | 27           |
| M27          | 8.29   | 0.76   | 5          | -0.81     | 1.00                    | 14.51                              | 00.00          | 194.62 | 11         | 1              | 1               | 20             | 20    | 4           | 32           |
| M28          | 8.39   | 0.06   | 5          | -1.87     | 1.00                    | 00.00                              | 00.00          | 270.13 | 16         | 3              | 1               | 14             | 14    | 4           | 33           |
